# Supplementary material
Source: PubMed Central journal article supplement (PMC6328250)

**Supporting Information for**  
**Structurally Diverse Metabolites from the Soft  
Coral *Sinularia verruca* Collected in the South  
China Sea**

Weiping Yuan,<sup>†</sup> Shimiao Cheng,<sup>‡</sup> Weitao Fu,<sup>†</sup> Min Zhao,<sup>†</sup> Xiubao Li,<sup>§</sup> Yuepiao Cai,<sup>†</sup>

Jianyong Dong,<sup>†</sup> Kexin Huang,<sup>†</sup> Kirk R. Gustafson,<sup>\*,<sup>⊥</sup></sup> and Pengcheng Yan<sup>\*,<sup>†,⊥</sup></sup>

<sup>†</sup>School of Pharmaceutical Sciences, Wenzhou Medical University, Wenzhou,

Zhejiang 325035, People's Republic of China

<sup>‡</sup>The Fifth Affiliated Hospital, Wenzhou Medical University, Lishui, Zhejiang 323000,

People's Republic of China

<sup>§</sup>Key Laboratory of Marine Bio-resources Sustainable Utilization, South China Sea

Institute of Oceanology, Chinese Academy of Sciences, Guangzhou, Guangdong

510301, People's Republic of China

<sup>⊥</sup>Molecular Targets Laboratory, Center for Cancer Research, National Cancer Institute,

Frederick, Maryland 21702-1201, United States

\*To whom correspondence should be addressed. (K. R. Gustafson) Tel:

+1-301-8465197. Fax: +1-301-8466851. E-mail: [gustafki@mail.nih.gov](mailto:gustafki@mail.nih.gov).

(P. Yan) E-mail: [yanpc@wzmc.edu.cn](mailto:yanpc@wzmc.edu.cn); [pengcheng.yan@nih.gov](mailto:pengcheng.yan@nih.gov).

## List of supporting information

**Figure S1.**  $^1\text{H}$  NMR spectrum (600 MHz) of compound **1** in  $\text{CDCl}_3$ .

**Figure S2.**  $^{13}\text{C}$  NMR spectrum (150 MHz) of compound **1** in  $\text{CDCl}_3$ .

**Figure S3.** HMQC spectrum of compound **1** in  $\text{CDCl}_3$ .

**Figure S4.** HMBC spectrum of compound **1** in  $\text{CDCl}_3$ .

**Figure S5.** COSY spectrum of compound **1** in  $\text{CDCl}_3$ .

**Figure S6.** NOESY spectrum of compound **1** in  $\text{CDCl}_3$ .

**Figure S7.** HRESIMS spectrum of compound **1**.

**Figure S8.**  $^1\text{H}$  NMR spectrum (600 MHz) of compound **2** in  $\text{CDCl}_3$ .

**Figure S9.**  $^{13}\text{C}$  NMR spectrum (150 MHz) of compound **2** in  $\text{CDCl}_3$ .

**Figure S10.** HMQC spectrum of compound **2** in  $\text{CDCl}_3$ .

**Figure S11.** HMBC spectrum of compound **2** in  $\text{CDCl}_3$ .

**Figure S12.** COSY spectrum of compound **2** in  $\text{CDCl}_3$ .

**Figure S13.** NOESY spectrum of compound **2** in  $\text{CDCl}_3$ .

**Figure S14.** Expanded portion of the NOESY spectrum of compound **2**.

**Figure S15.** HRESIMS spectrum of compound **2**.

**Figure S16.**  $^1\text{H}$  NMR spectrum (600 MHz) of compound **3** in  $\text{CDCl}_3$ .

**Figure S17.**  $^{13}\text{C}$  NMR spectrum (150 MHz) of compound **3** in  $\text{CDCl}_3$ .

**Figure S18.** HMQC spectrum of compound **3** in  $\text{CDCl}_3$ .

**Figure S19.** HMBC spectrum of compound **3** in  $\text{CDCl}_3$ .

**Figure S20.** COSY spectrum of compound **3** in  $\text{CDCl}_3$ .

**Figure S21.** HRESIMS spectrum of compound **3**.

**Figure S22.**  $^1\text{H}$  NMR spectrum (600 MHz) of compound **4** in  $\text{CDCl}_3$ .

**Figure S23.**  $^{13}\text{C}$  NMR spectrum (150 MHz) of compound **4** in  $\text{CDCl}_3$ .

**Figure S24.** HMQC spectrum of compound **4** in  $\text{CDCl}_3$ .

**Figure S25.** HMBC spectrum of compound **4** in  $\text{CDCl}_3$ .

**Figure S26.** COSY spectrum of compound **4** in  $\text{CDCl}_3$ .

**Figure S27.** NOESY spectrum of compound **4** in  $\text{CDCl}_3$ .

**Figure S28.** HRESIMS spectrum of compound **4**.

**Figure S29.**  $^1\text{H}$  NMR spectrum (600 MHz) of compound **5** in  $\text{CDCl}_3$ .

**Figure S30.**  $^{13}\text{C}$  NMR spectrum (150 MHz) of compound **5** in  $\text{CDCl}_3$ .

**Figure S31.** HMQC spectrum of compound **5** in  $\text{CDCl}_3$ .

**Figure S32.** HMBC spectrum of compound **5** in  $\text{CDCl}_3$ .

**Figure S33.** COSY spectrum of compound **5** in  $\text{CDCl}_3$ .

**Figure S34.** HRESIMS spectrum of compound **5**.

**Figure S35.**  $^1\text{H}$  NMR spectrum (600 MHz) of compound **6** in  $\text{CDCl}_3$ .

**Figure S36.**  $^{13}\text{C}$  NMR spectrum (150 MHz) of compound **6** in  $\text{CDCl}_3$ .

**Figure S37.** HMQC spectrum of compound **6** in  $\text{CDCl}_3$ .

**Figure S38.** HMBC spectrum of compound **6** in  $\text{CDCl}_3$ .

**Figure S39.** COSY spectrum of compound **6** in  $\text{CDCl}_3$ .

**Figure S40.** NOESY spectrum of compound **6** in  $\text{CDCl}_3$ .

**Figure S41.** HRESIMS spectrum of compound **6**.

**Figure S42.**  $^1\text{H}$  NMR spectrum (600 MHz) of compound **16** in  $\text{CDCl}_3$ .

**Figure S43.**  $^{13}\text{C}$  NMR spectrum (150 MHz) of compound **16** in  $\text{CDCl}_3$ .

**Figure S44.** HMQC spectrum of compound **16** in  $\text{CDCl}_3$ .

**Figure S45.** HMBC spectrum of compound **16** in  $\text{CDCl}_3$ .

**Figure S46.** COSY spectrum of compound **16** in  $\text{CDCl}_3$ .

**Figure S47.** NOESY spectrum of compound **16** in  $\text{CDCl}_3$ .

**Figure S48.** HRESIMS spectrum of compound **16**.

**Figure S49.**  $^1\text{H}$  NMR spectrum (600 MHz) of compound **17** in  $\text{CDCl}_3$ .

**Figure S50.**  $^{13}\text{C}$  NMR spectrum (150 MHz) of compound **17** in  $\text{CDCl}_3$ .

**Figure S51.** HMQC spectrum of compound **17** in  $\text{CDCl}_3$ .

**Figure S52.** HMBC spectrum of compound **17** in  $\text{CDCl}_3$ .

**Figure S53.** COSY spectrum of compound **17** in  $\text{CDCl}_3$ .

**Figure S54.** HRESIMS spectrum of compound **17**.

**Figure S1.**  $^1\text{H}$  NMR spectrum (600 MHz) of compound **1** in  $\text{CDCl}_3$ .

WP-18,  $^1\text{H}$ ,  $\text{CDCl}_3$ , 600MHz

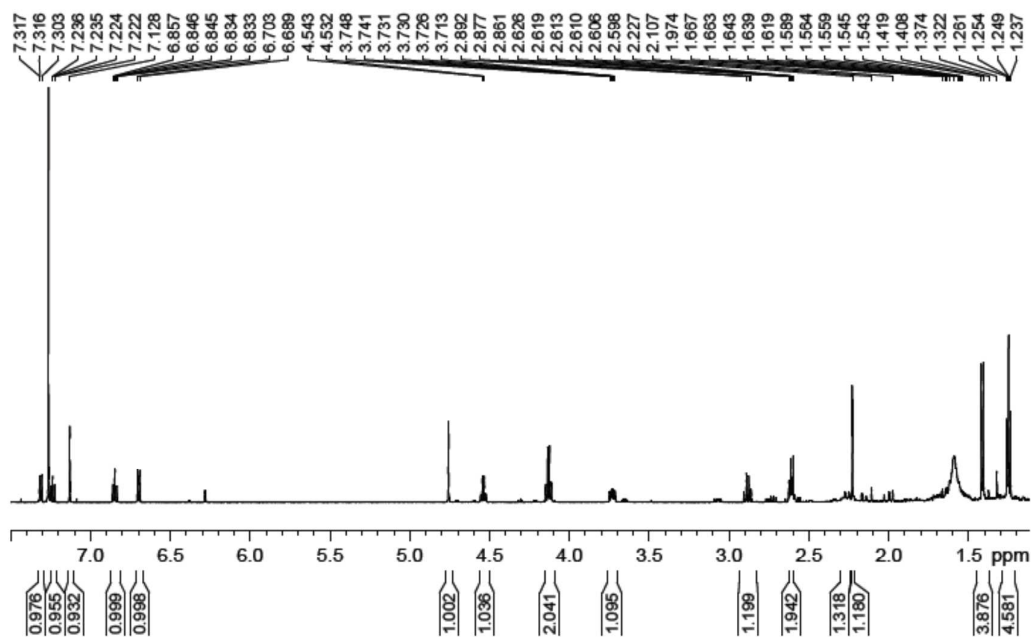

**Figure S2.**  $^{13}\text{C}$  NMR spectrum (150 MHz) of compound **1** in  $\text{CDCl}_3$ .

WP-18,  $^{13}\text{C}$ ,  $\text{CDCl}_3$ , 150MHz

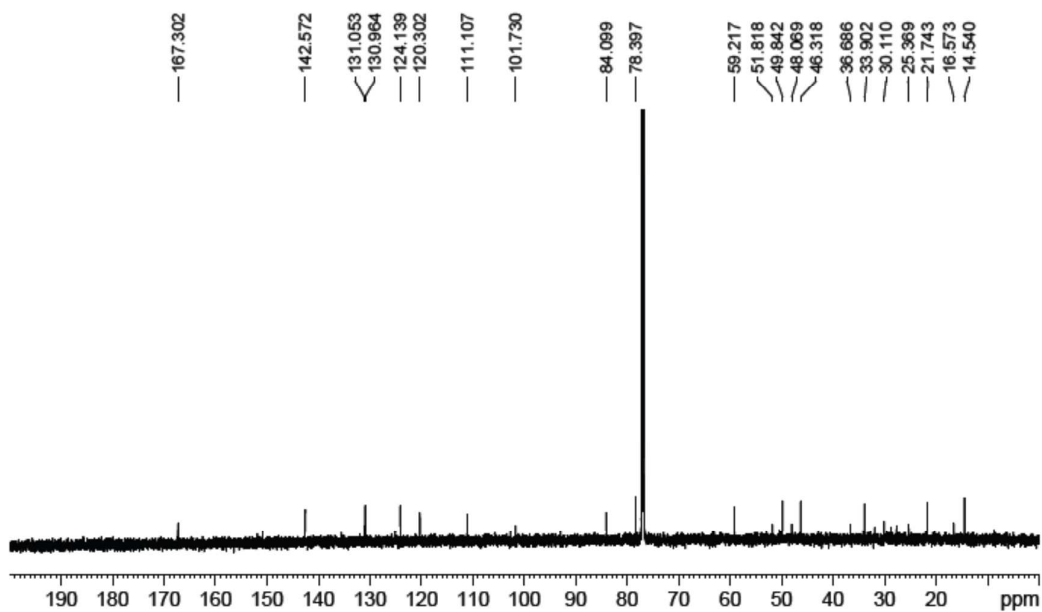

**Figure S3.** HMQC spectrum of compound **1** in CDCl<sub>3</sub>.

WP-18, HMQC, CDCl<sub>3</sub>, 600MHz

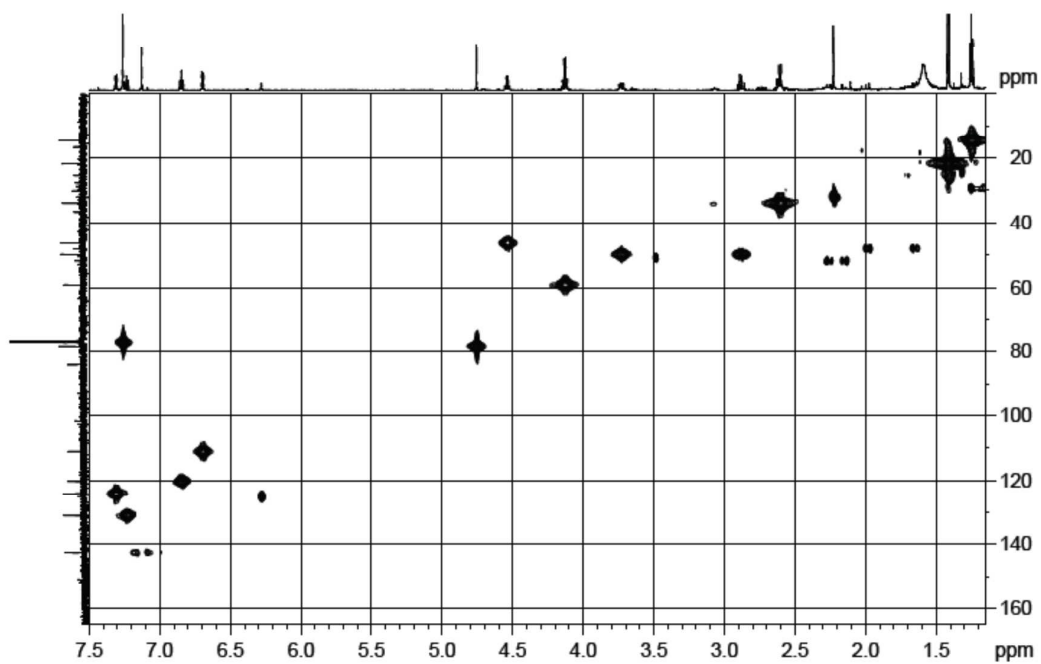

**Figure S4.** HMBC spectrum of compound **1** in CDCl<sub>3</sub>.

WP-18, HMBC, CDCl<sub>3</sub>, 600MHz

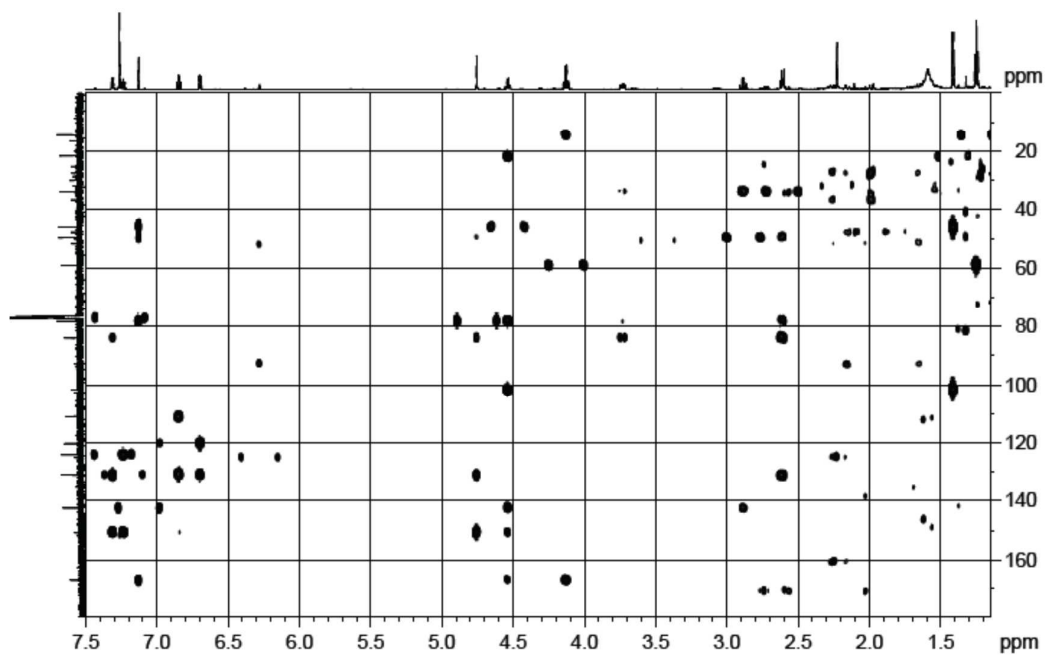

**Figure S5.** COSY spectrum of compound **1** in CDCl<sub>3</sub>.

WP-18, COSY, CDCl<sub>3</sub>, 600MHz

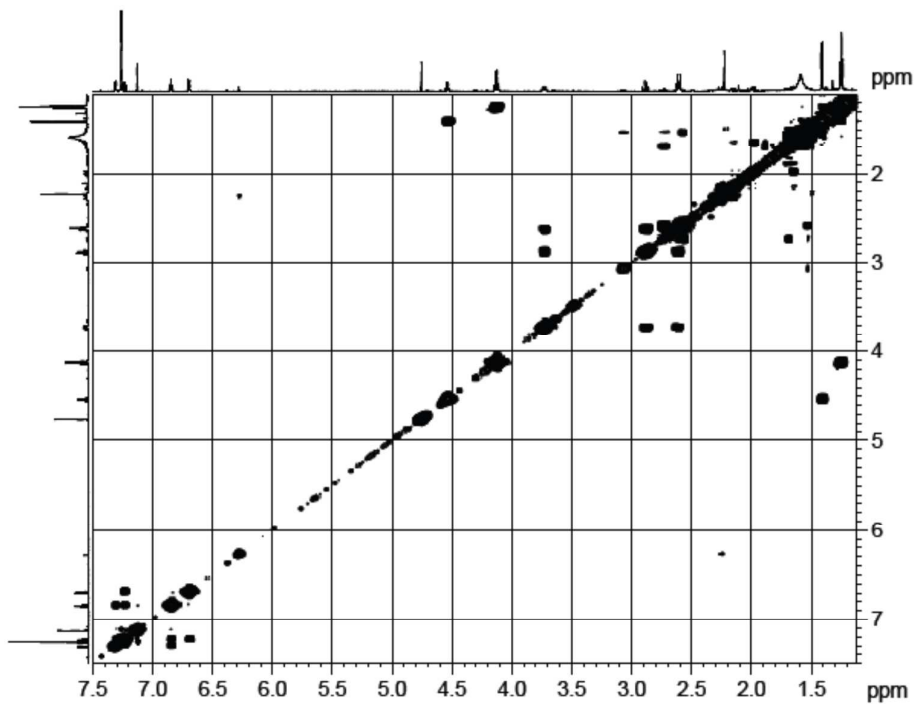

**Figure S6.** NOESY spectrum of compound **1** in CDCl<sub>3</sub>.

WP-18, NOESY, CDCl<sub>3</sub>, 600MHz

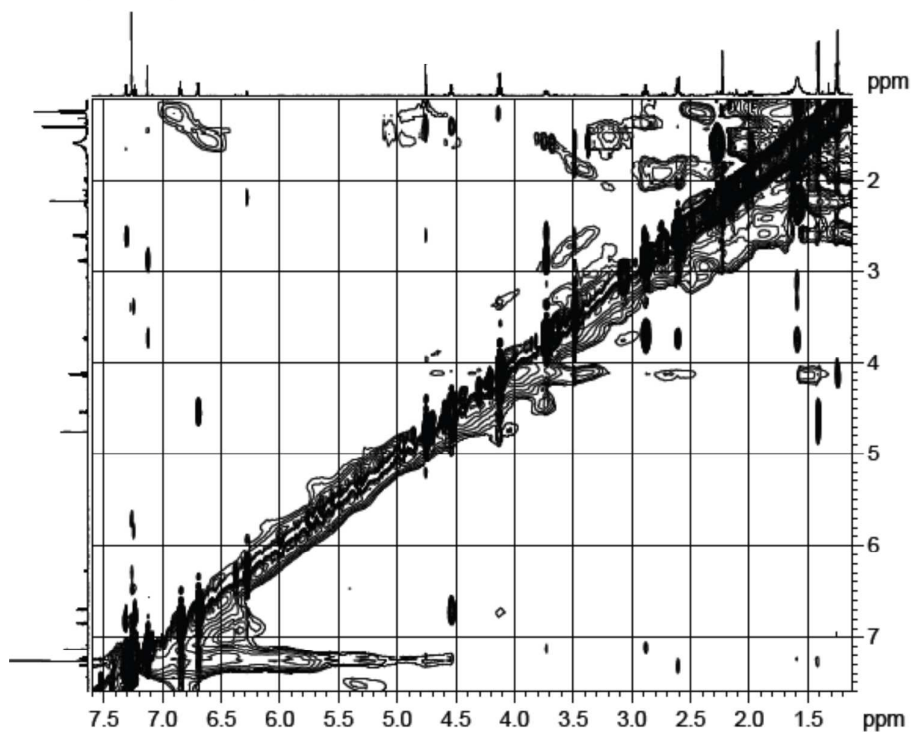

**Figure S7.** HRESIMS spectrum of compound **1**.

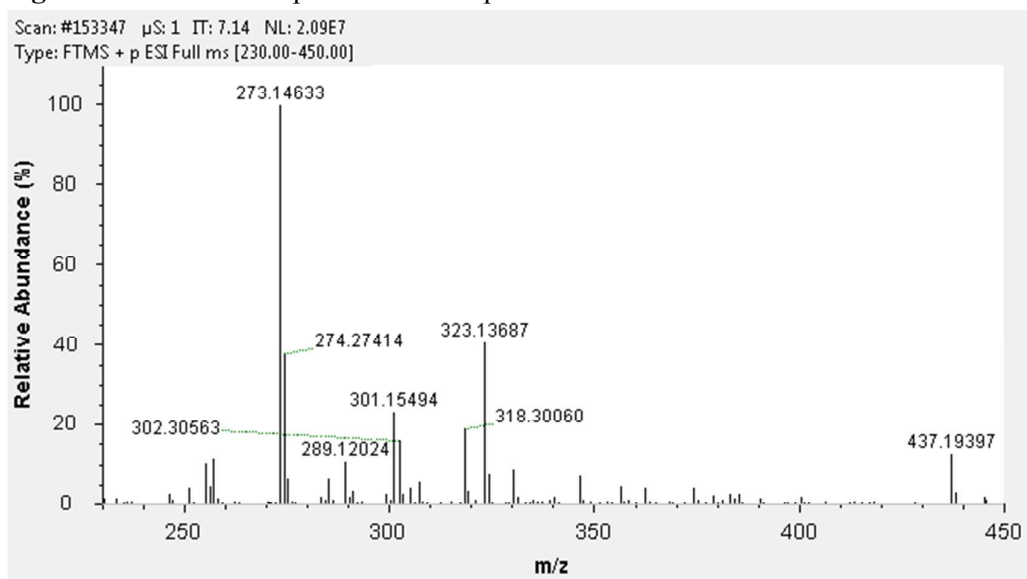

**Figure S8.**  $^1\text{H}$  NMR spectrum (600 MHz) of compound **2** in  $\text{CDCl}_3$ .

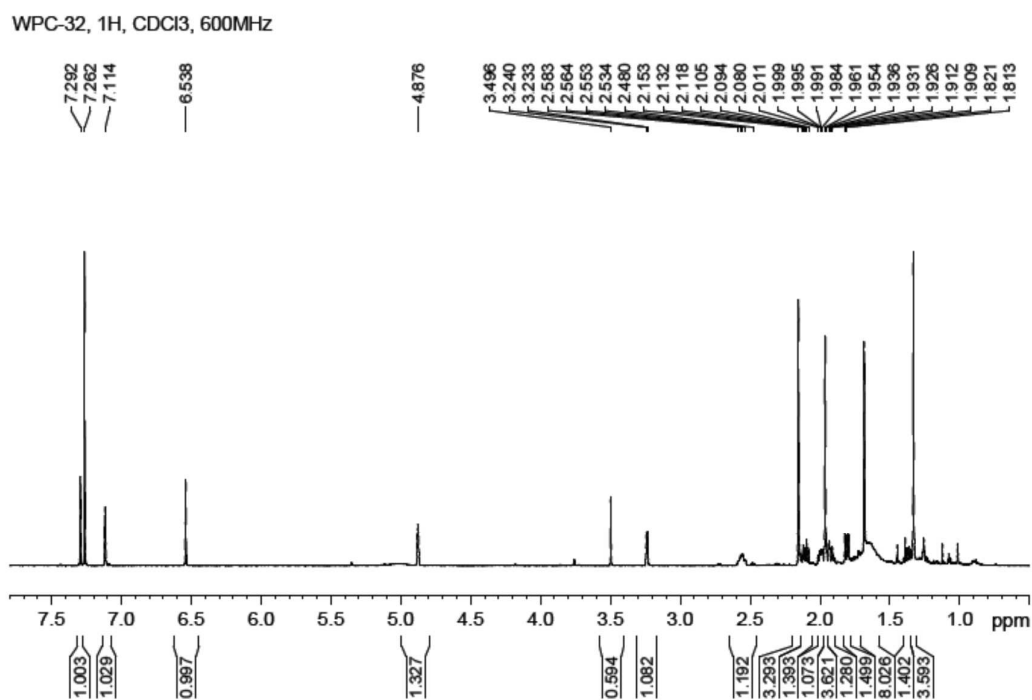

**Figure S9.**  $^{13}\text{C}$  NMR spectrum (150 MHz) of compound **2** in  $\text{CDCl}_3$ .

WPC-32,  $^{13}\text{C}$ ,  $\text{CDCl}_3$ , 150MHz

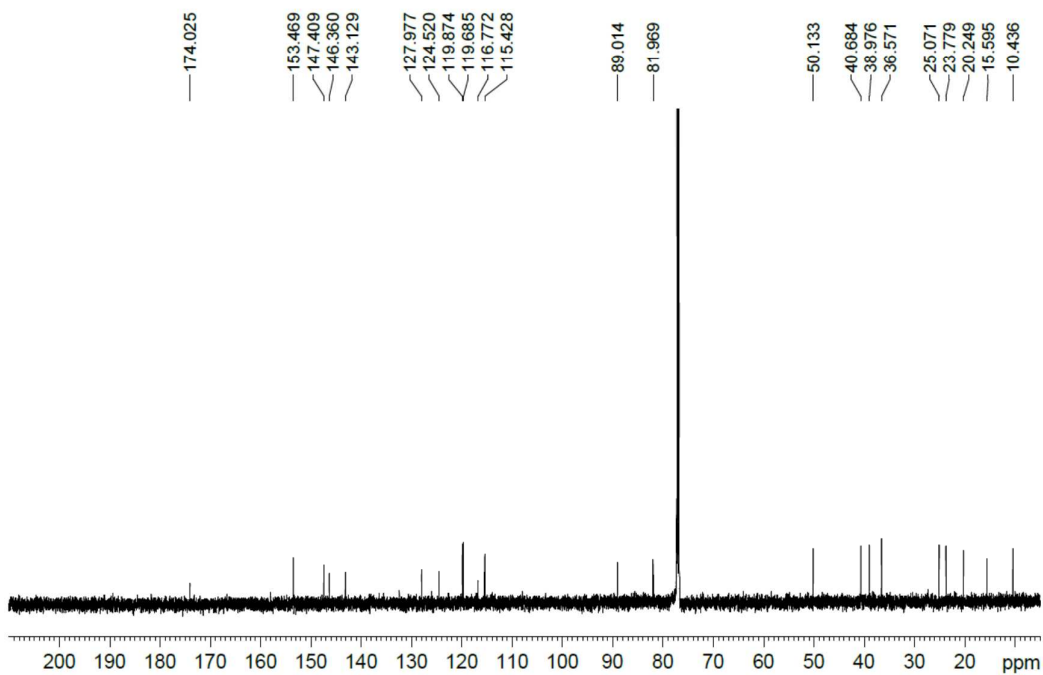

**Figure S10.** HMQC spectrum of compound **2** in  $\text{CDCl}_3$ .

WPC-32, HMQC,  $\text{CDCl}_3$ , 600MHz

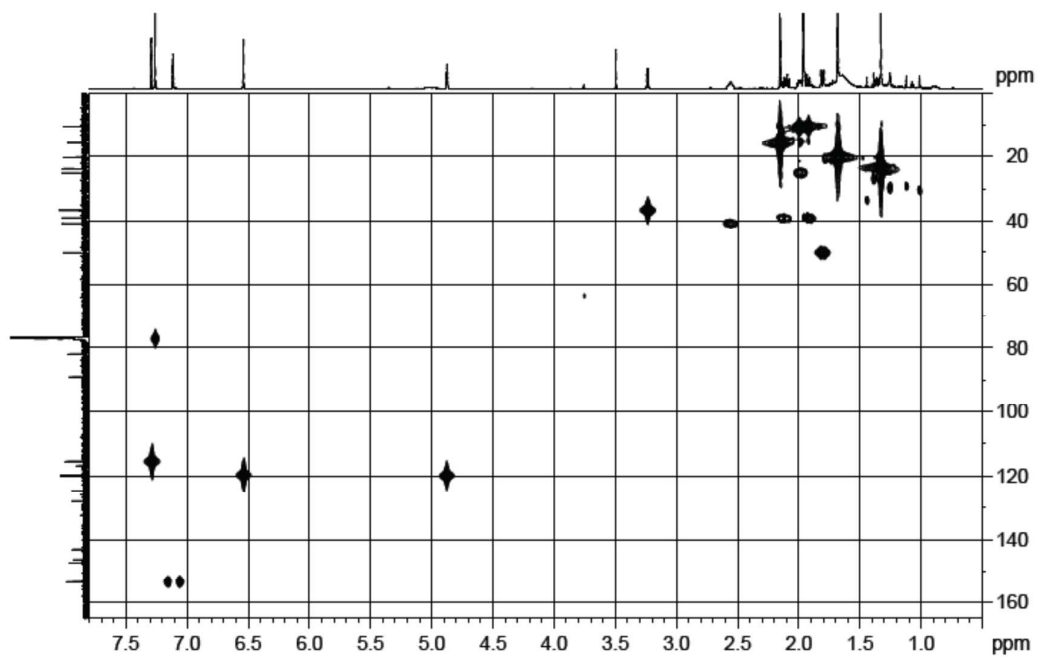



**Figure S11.** HMBC spectrum of compound **2** in CDCl<sub>3</sub>.

WPC-32, HMBC, CDCl<sub>3</sub>, 600MHz

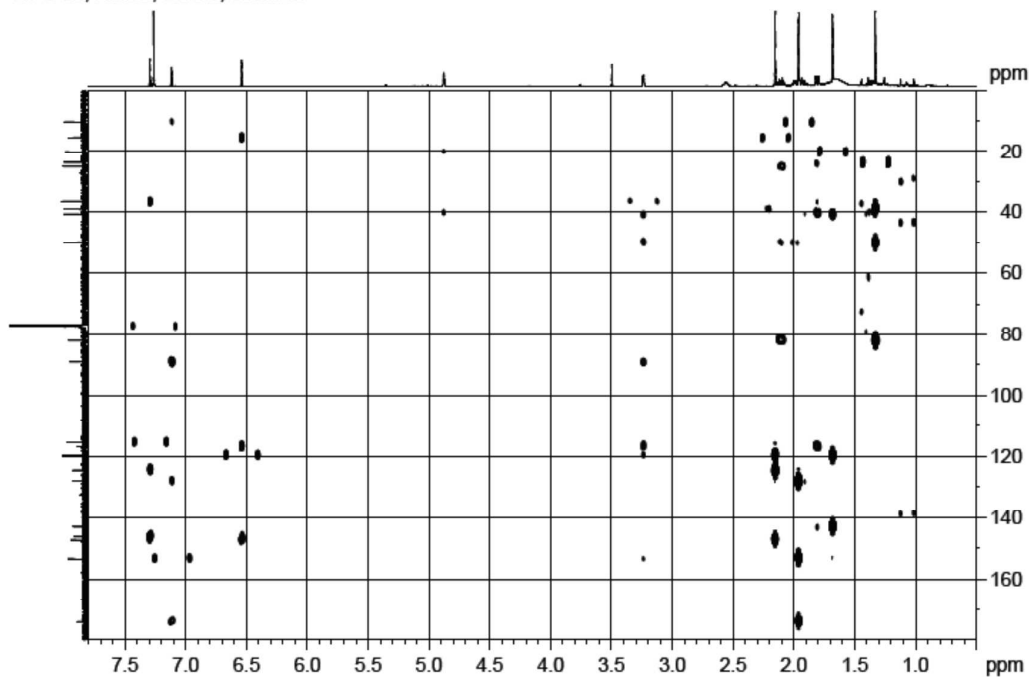

**Figure S12.** COSY spectrum of compound **2** in CDCl<sub>3</sub>.

WPC-32, COSY, CDCl<sub>3</sub>, 600MHz

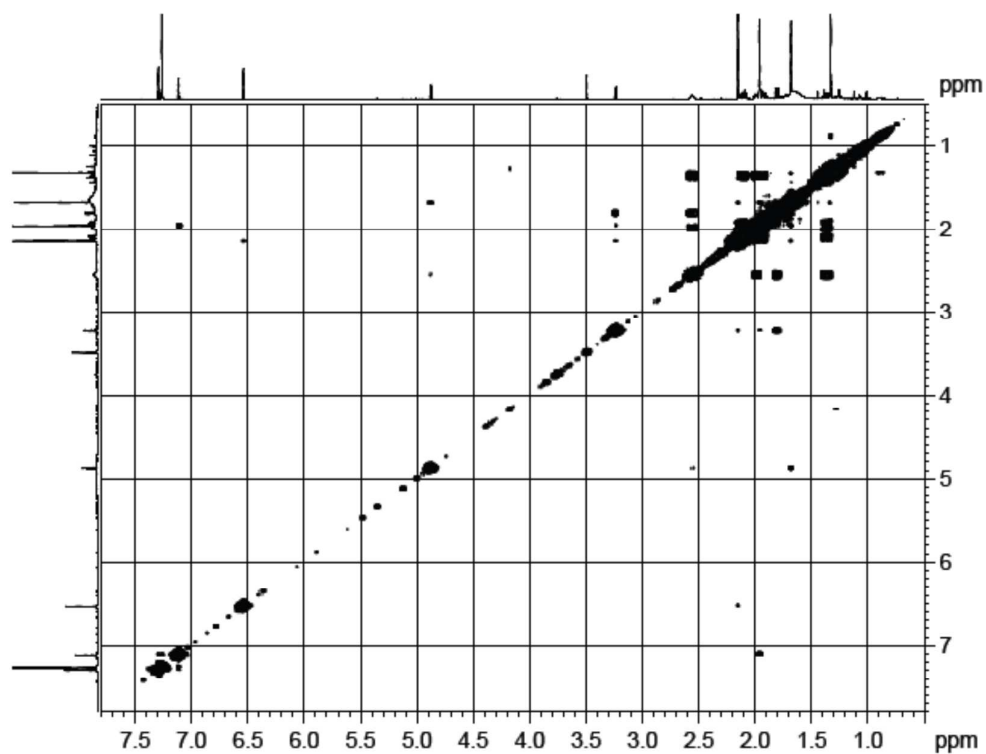

**Figure S13.** NOESY spectrum of compound **2** in CDCl<sub>3</sub>.

WPC-32, NOESY, CDCl<sub>3</sub>, 600MHz

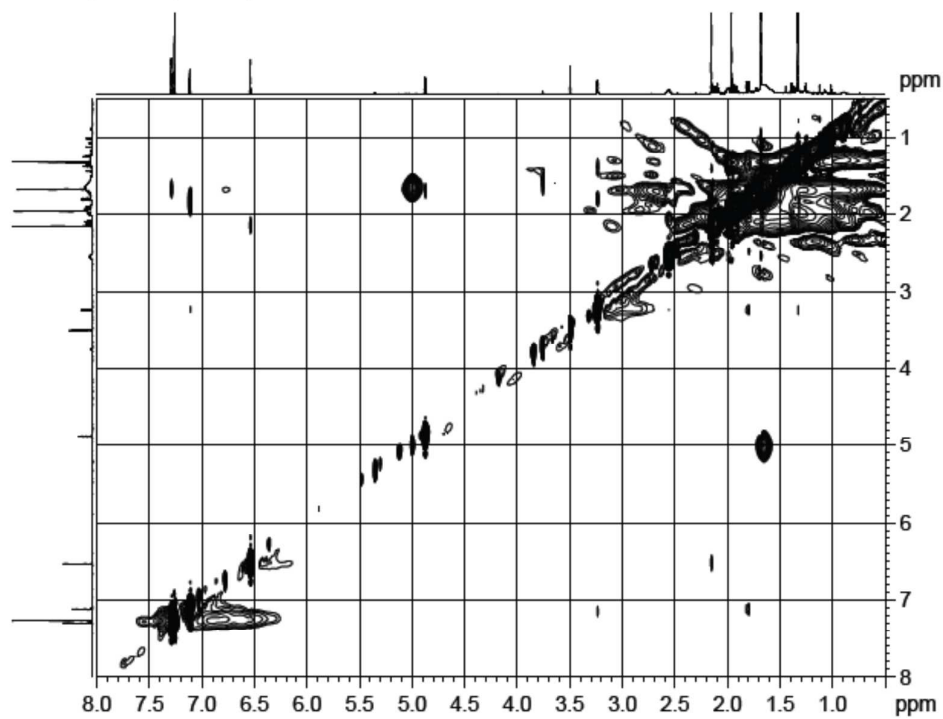

**Figure S14.** Expanded portion of the NOESY spectrum of compound **2**.

WPC-32, NOESY, CDCl<sub>3</sub>, 600MHz

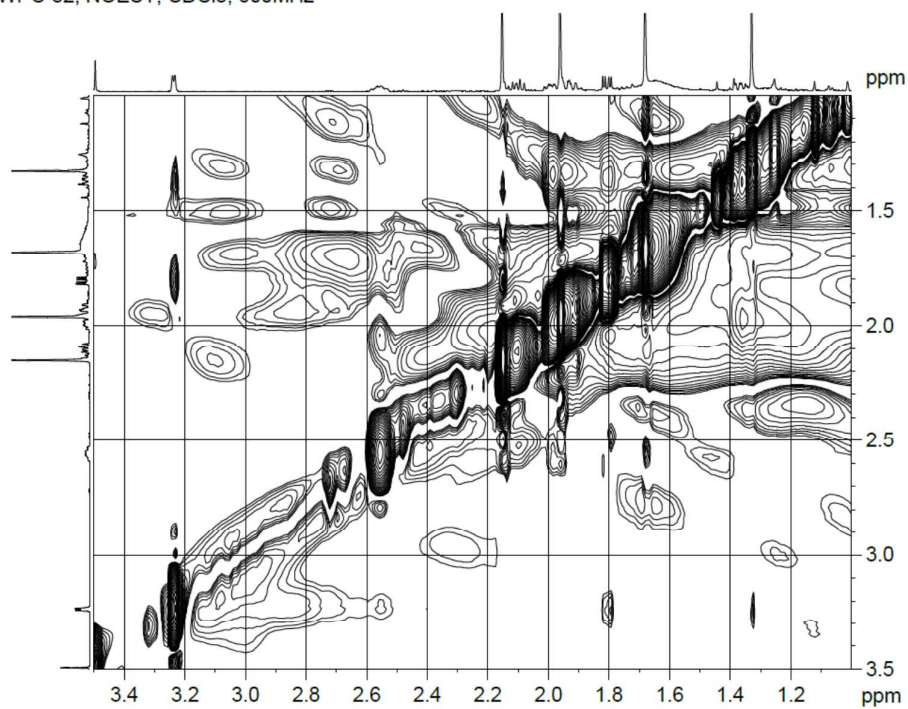

**Figure S15.** HRESIMS spectrum of compound **2**.

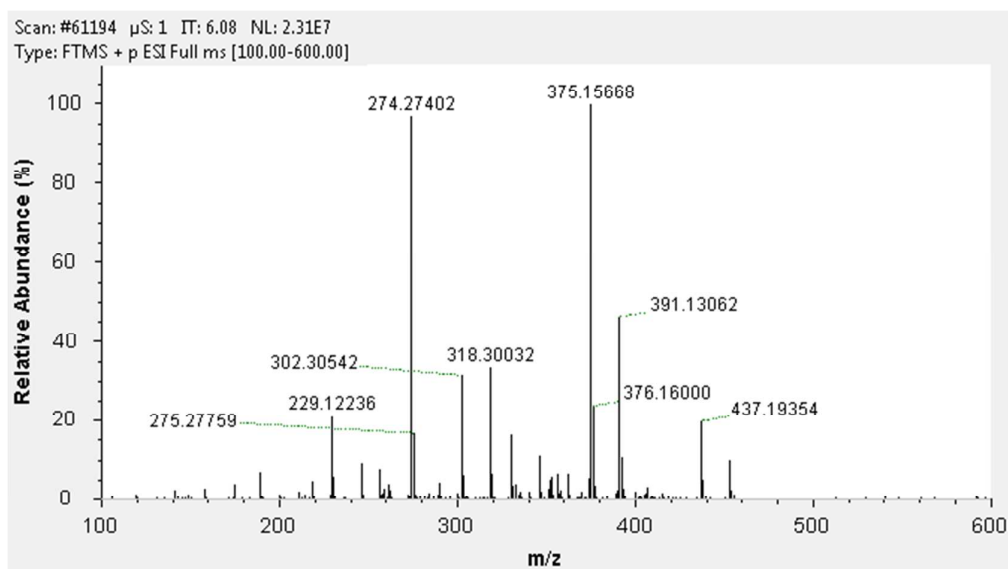

**Figure S16.**  $^1\text{H}$  NMR spectrum (600 MHz) of compound **3** in  $\text{CDCl}_3$ .

WPC-6,  $^1\text{H}$ ,  $\text{CDCl}_3$ , 600MHz

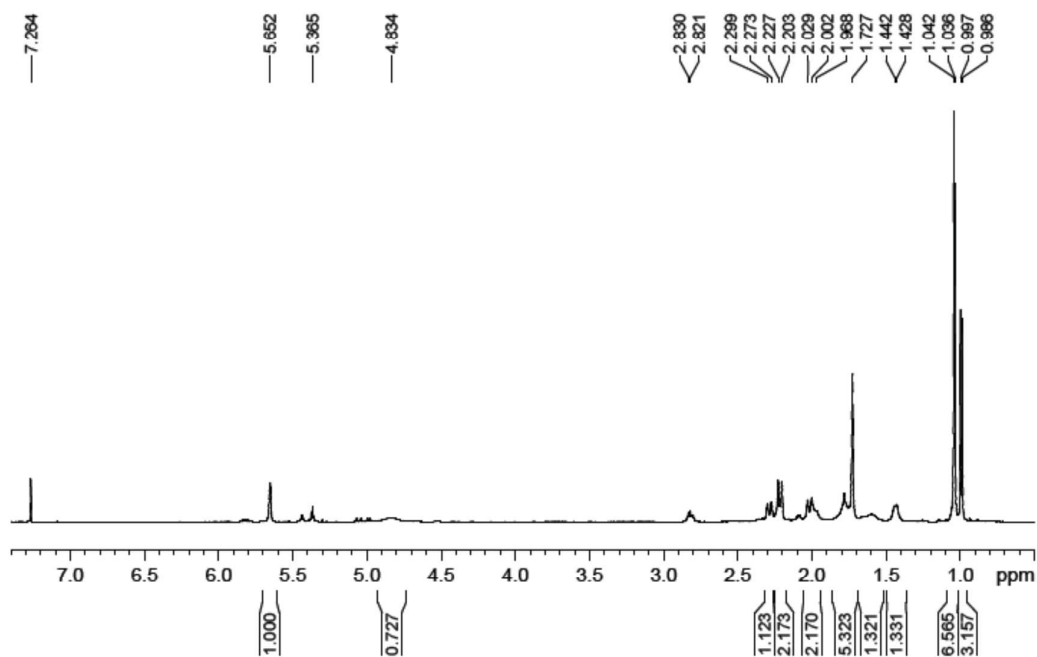

**Figure S17.**  $^{13}\text{C}$  NMR spectrum (150 MHz) of compound **3** in  $\text{CDCl}_3$ .  
WPC-6,  $^{13}\text{C}$ ,  $\text{CDCl}_3$ , 150MHz

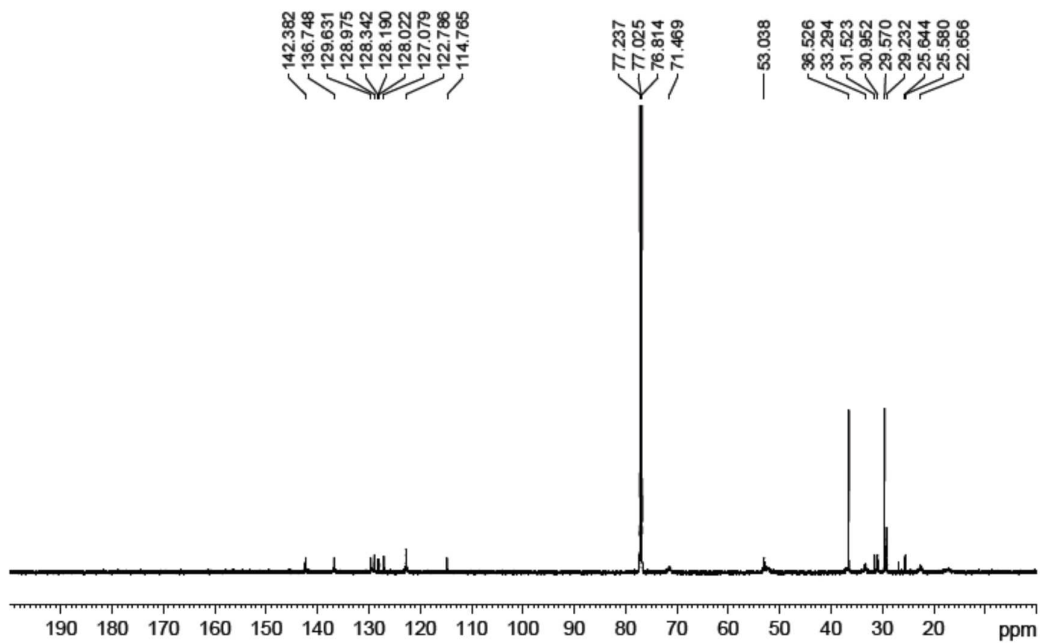

**Figure S18.** HMQC spectrum of compound **3** in  $\text{CDCl}_3$ .  
WPC-6, HMQC,  $\text{CDCl}_3$ , 600MHz

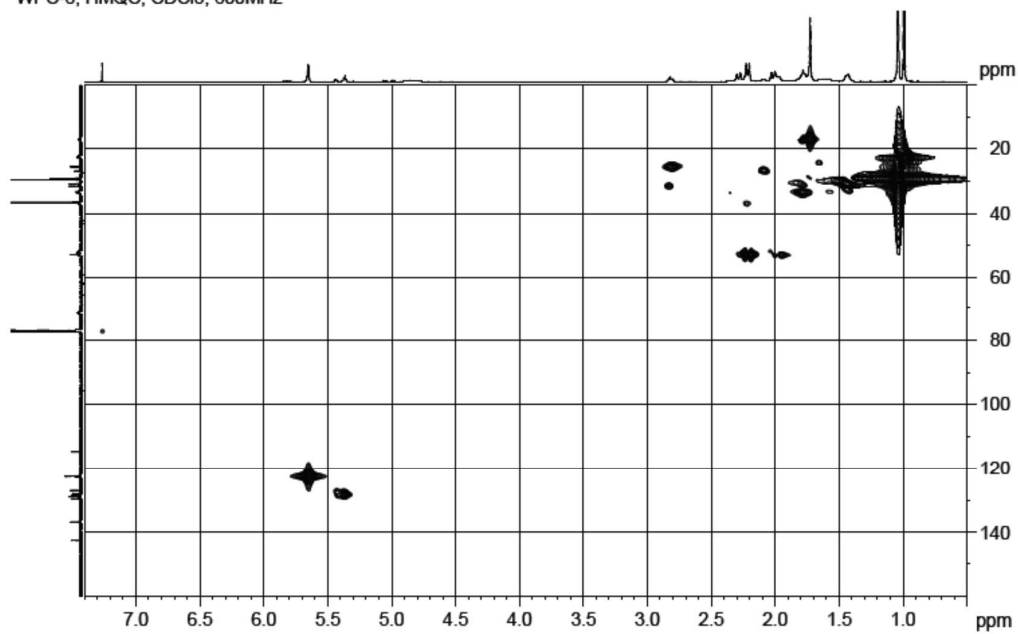

**Figure S19.** HMBC spectrum of compound **3** in CDCl<sub>3</sub>.

WPC-6, HMBC, CDCl<sub>3</sub>, 600MHz

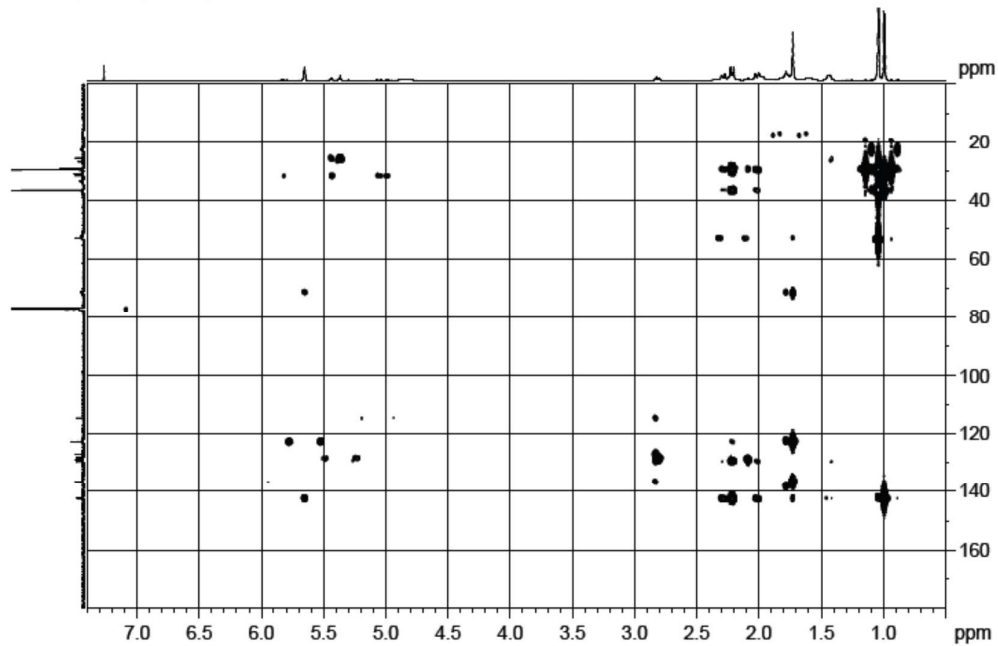

**Figure S20.** COSY spectrum of compound **3** in CDCl<sub>3</sub>.

WPC-6, COSY, CDCl<sub>3</sub>, 600MHz

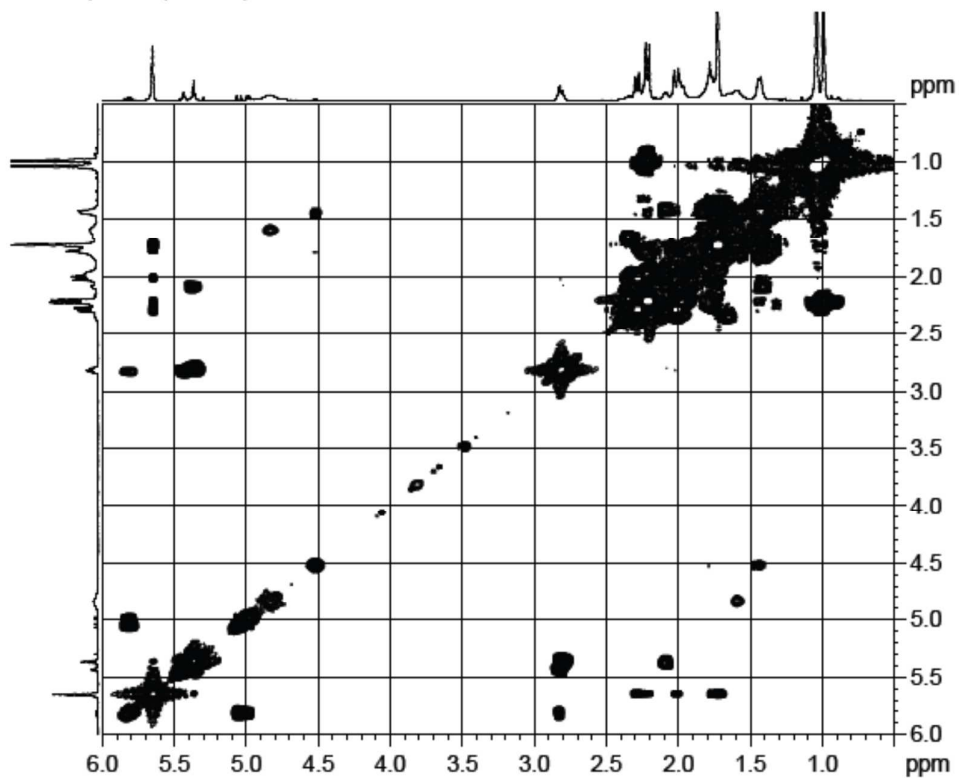

**Figure S21.** HRESIMS spectrum of compound **3**.

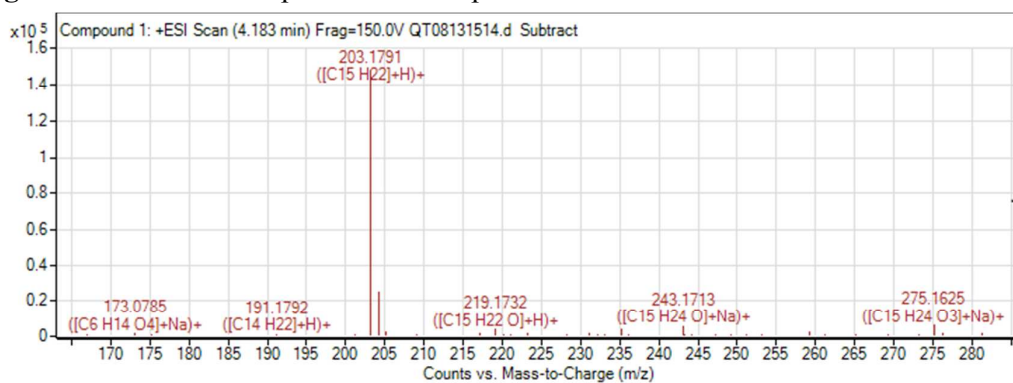

**Figure S22.**  $^1\text{H}$  NMR spectrum (600 MHz) of compound **4** in  $\text{CDCl}_3$ .

WP-49, 1H,  $\text{CDCl}_3$ , 600MHz

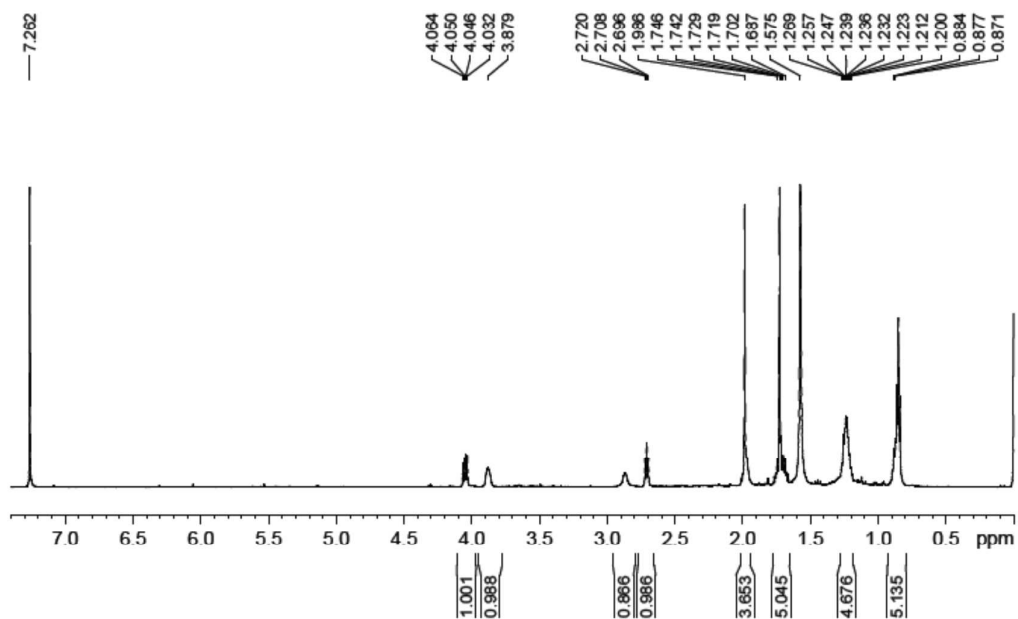

**Figure S23.**  $^{13}\text{C}$  NMR spectrum (150 MHz) of compound **4** in  $\text{CDCl}_3$ .

WP-49,  $^{13}\text{C}$ ,  $\text{CDCl}_3$ , 150MHz

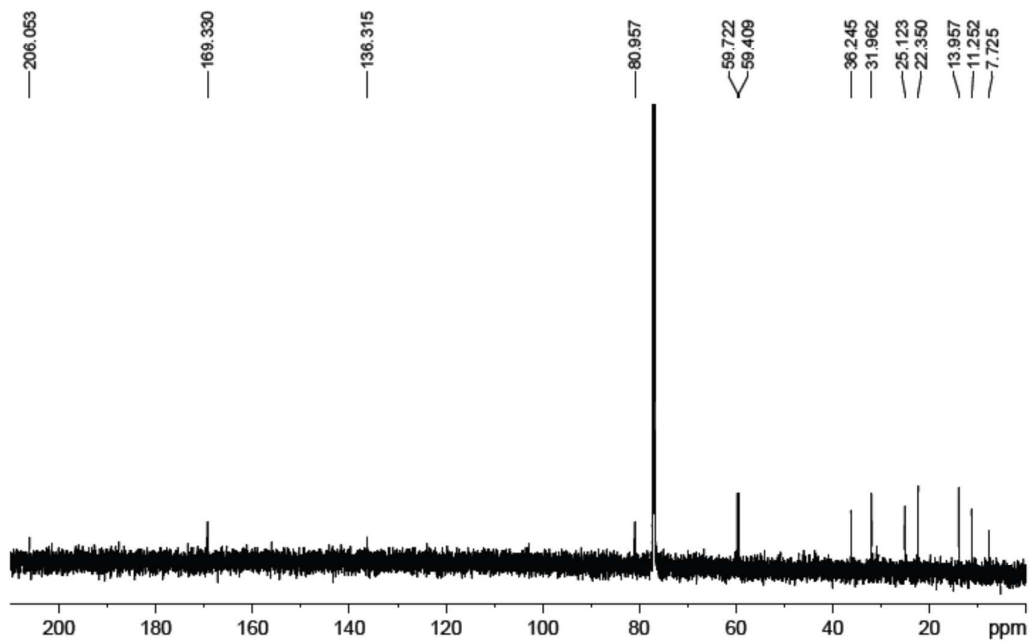

**Figure S24.** HMQC spectrum of compound **4** in  $\text{CDCl}_3$ .

WP-49, HMQC,  $\text{CDCl}_3$ , 600MHz

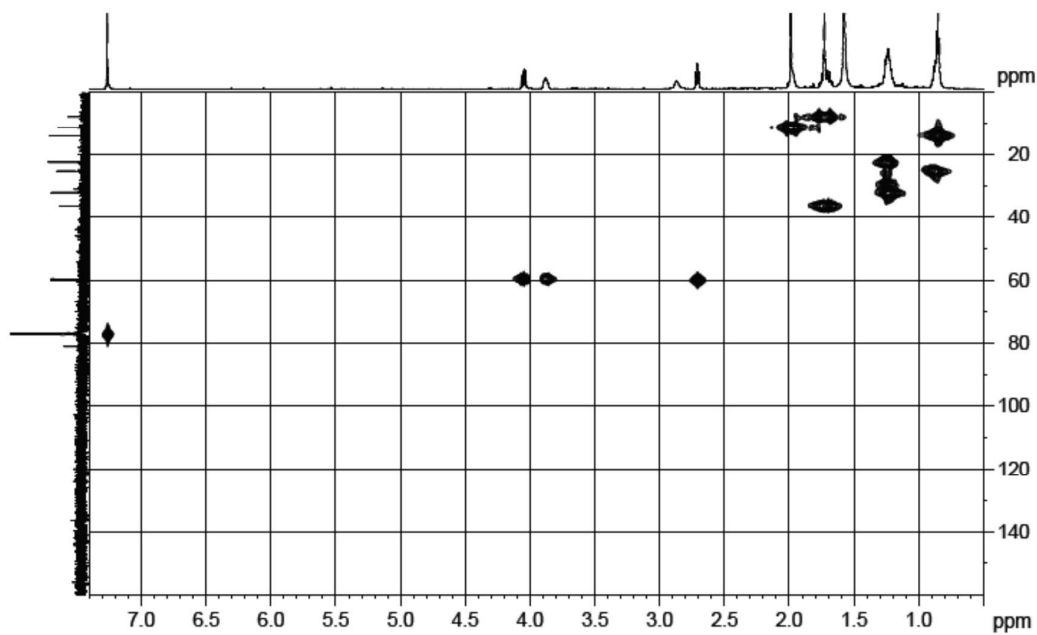

**Figure S25.** HMBC spectrum of compound **4** in CDCl<sub>3</sub>.

WP-49, HMBC, CDCl<sub>3</sub>, 600MHz

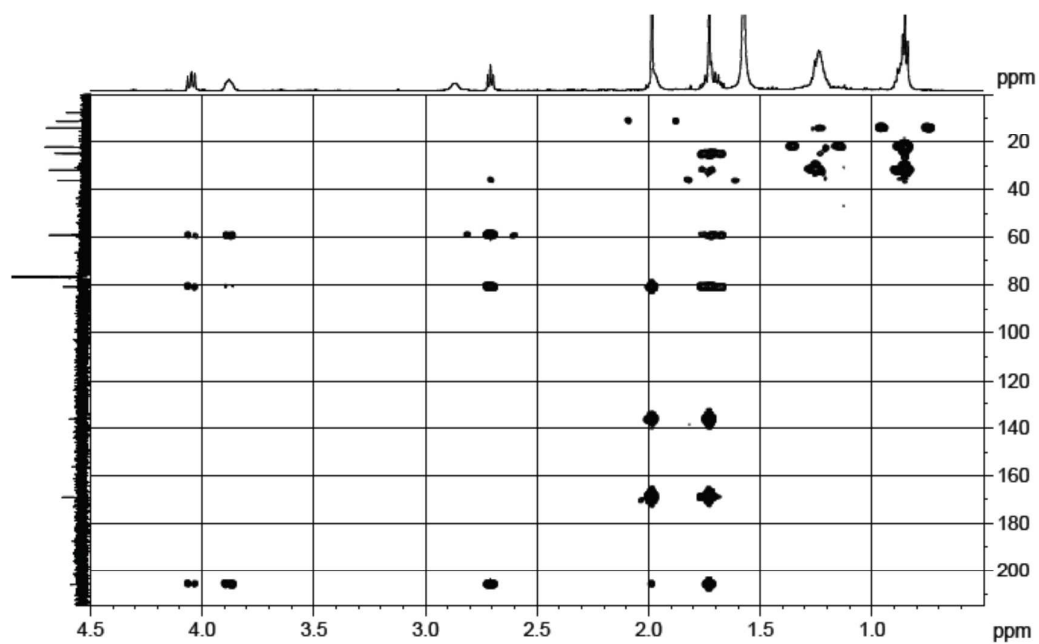

**Figure S26.** COSY spectrum of compound **4** in CDCl<sub>3</sub>.

WP-49, COSY, CDCl<sub>3</sub>, 600MHz

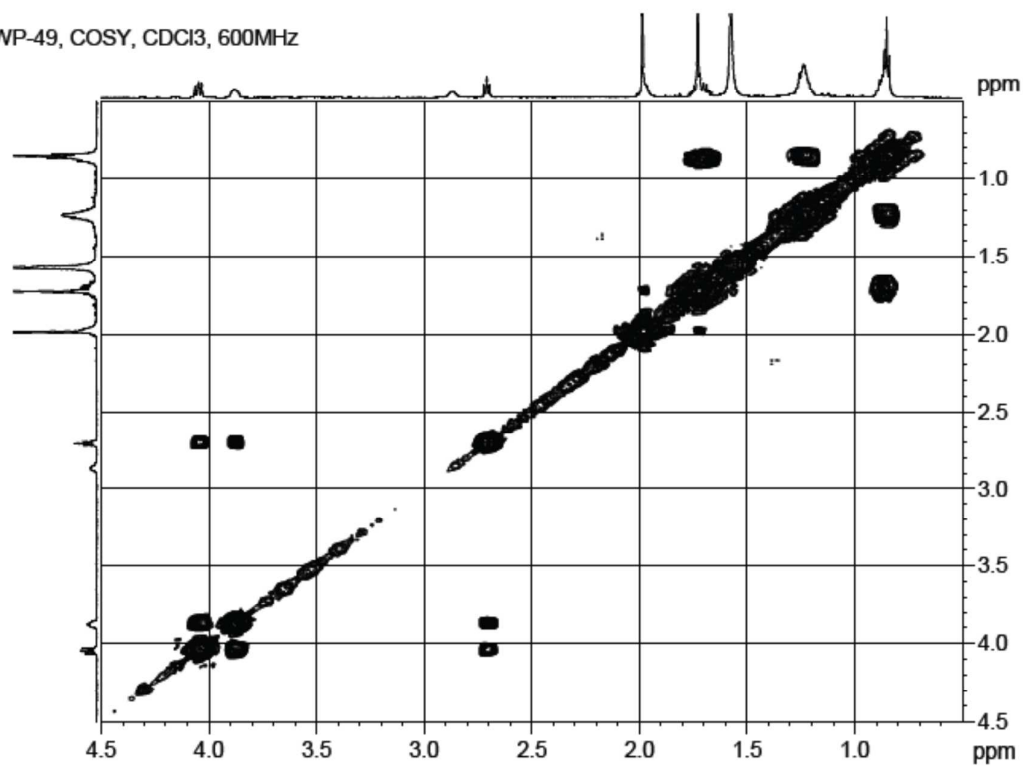



**Figure S27.** NOESY spectrum of compound **4** in CDCl<sub>3</sub>.

WP-49, NOESY, CDCl<sub>3</sub>, 600MHz

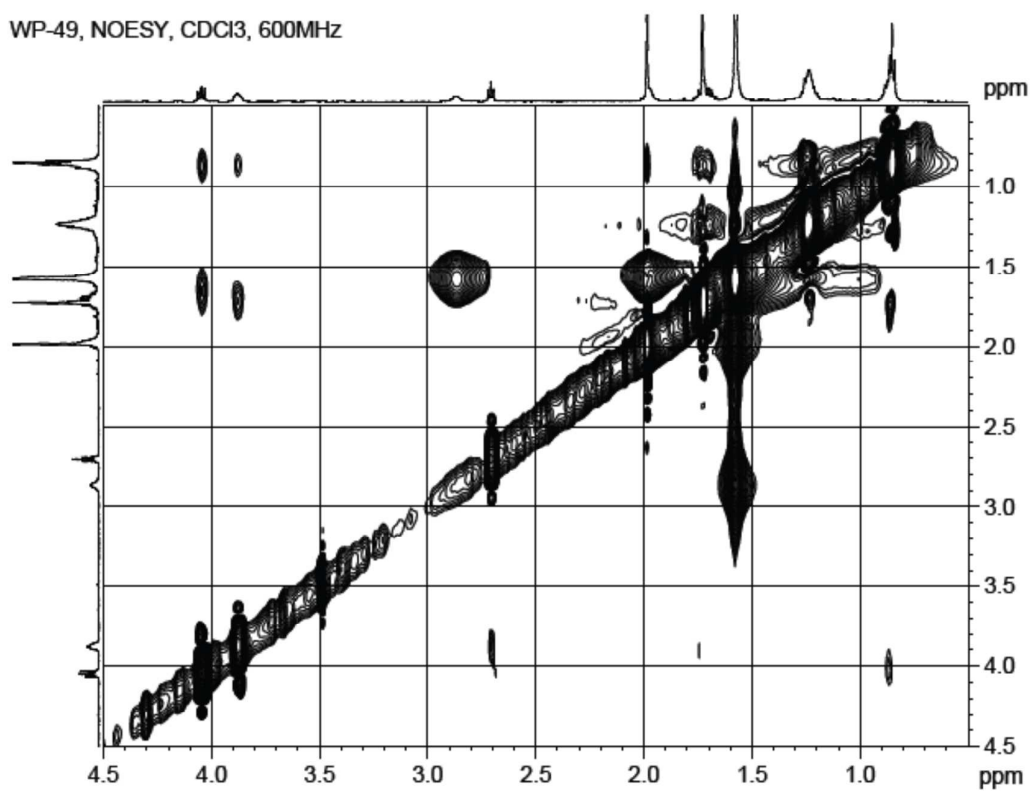

**Figure S28.** HRESIMS spectrum of compound **4**.

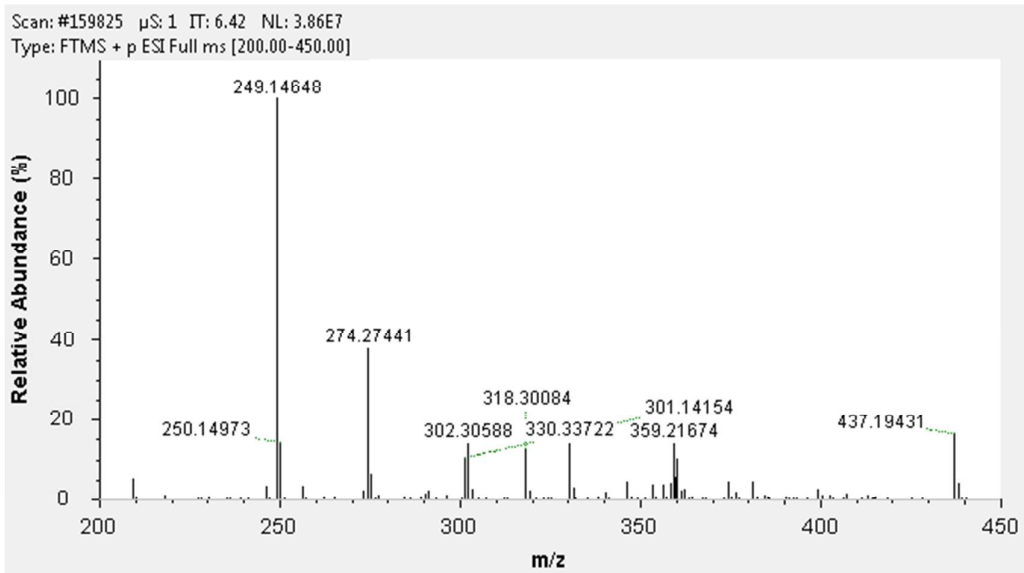

**Figure S29.**  $^1\text{H}$  NMR spectrum (600 MHz) of compound **5** in  $\text{CDCl}_3$ .

wp-16, 1H,  $\text{CDCl}_3$ , 600MHz

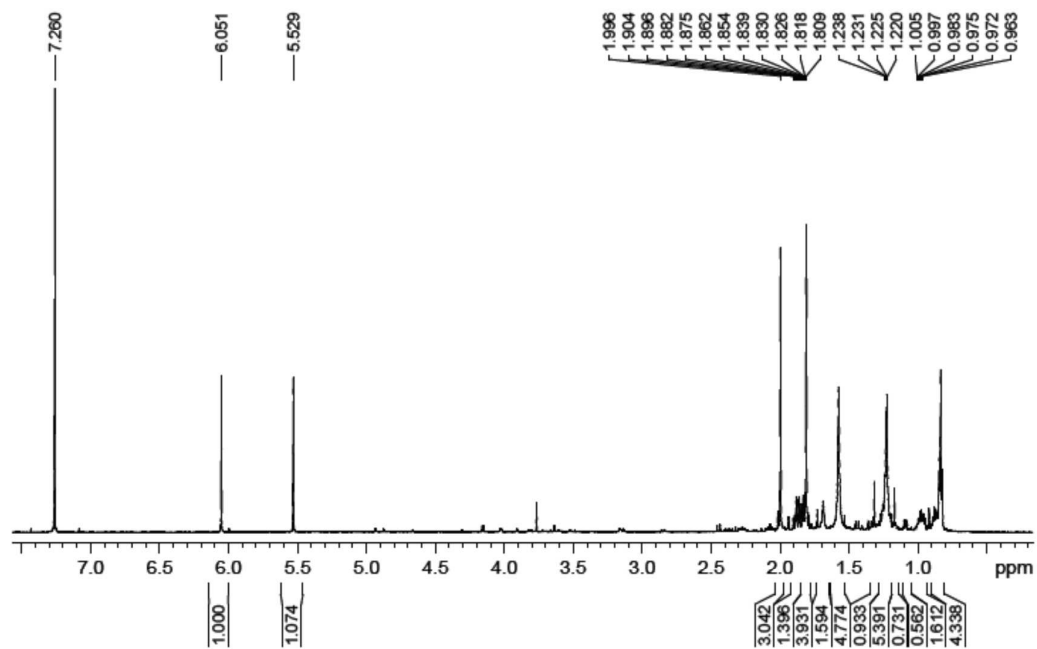

**Figure S30.**  $^{13}\text{C}$  NMR spectrum (150 MHz) of compound **5** in  $\text{CDCl}_3$ .

wp-16,  $^{13}\text{C}$ ,  $\text{CDCl}_3$ , 150MHz

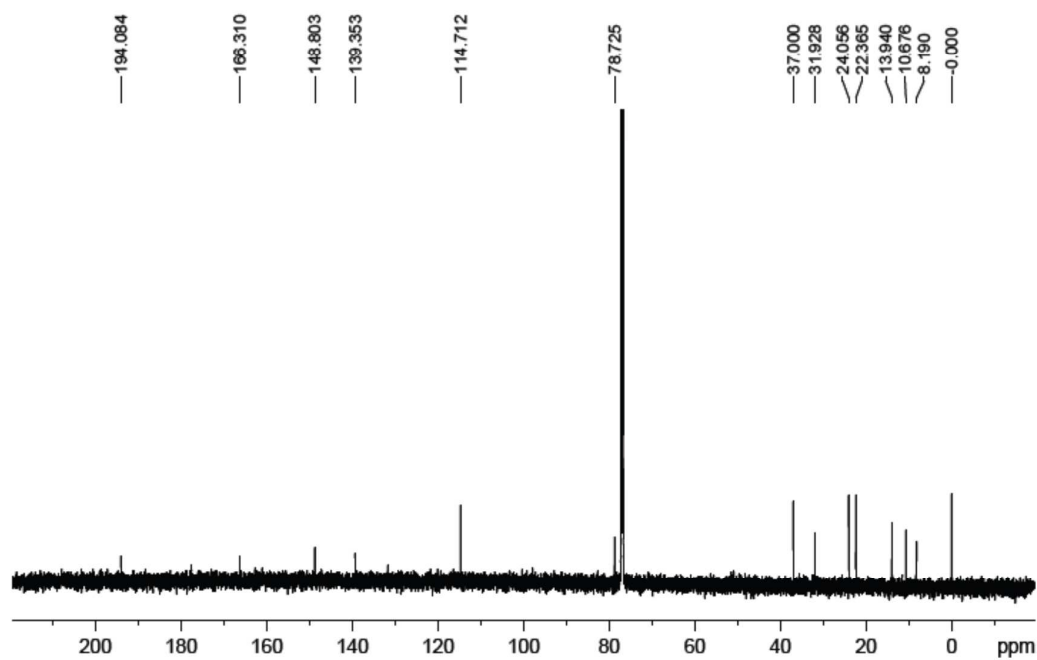

**Figure S31.** HMQC spectrum of compound **5** in CDCl<sub>3</sub>.

wp-16, HMQC, CDCl<sub>3</sub>, 600MHz

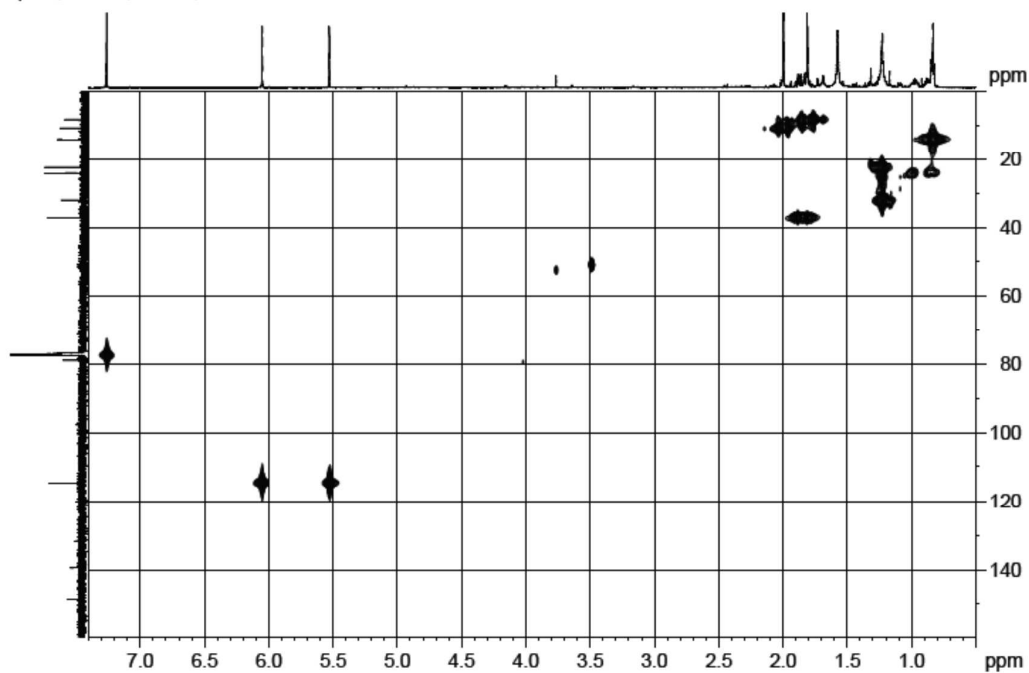

**Figure S32.** HMBC spectrum of compound **5** in CDCl<sub>3</sub>.

wp-16, HMBC, CDCl<sub>3</sub>, 600MHz

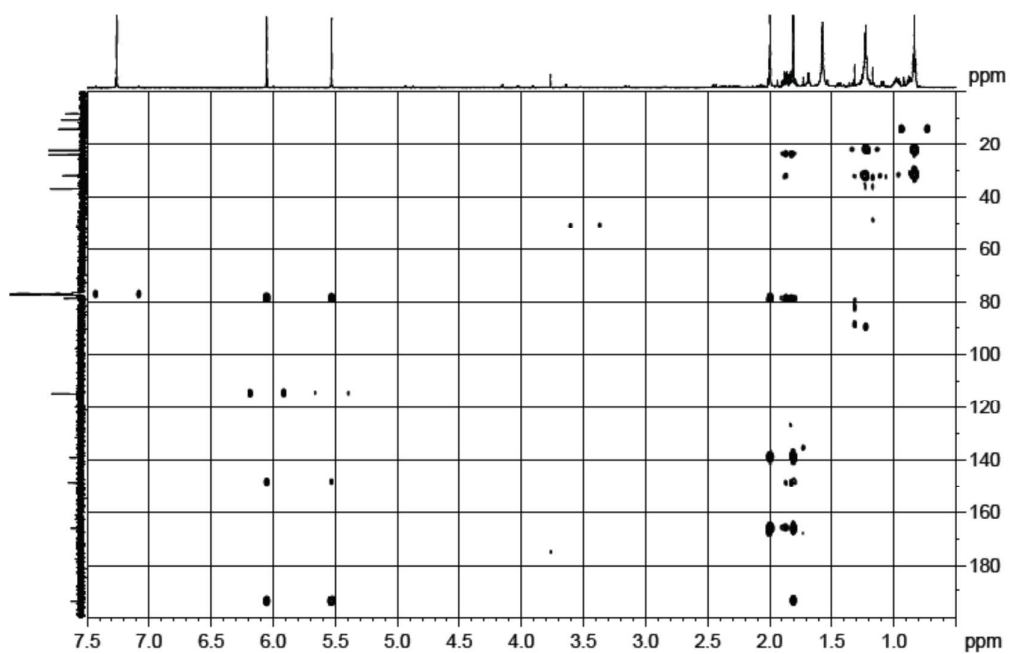

**Figure S33.** COSY spectrum of compound **5** in CDCl<sub>3</sub>.

wp-16, COSY, CDCl<sub>3</sub>, 600MHz

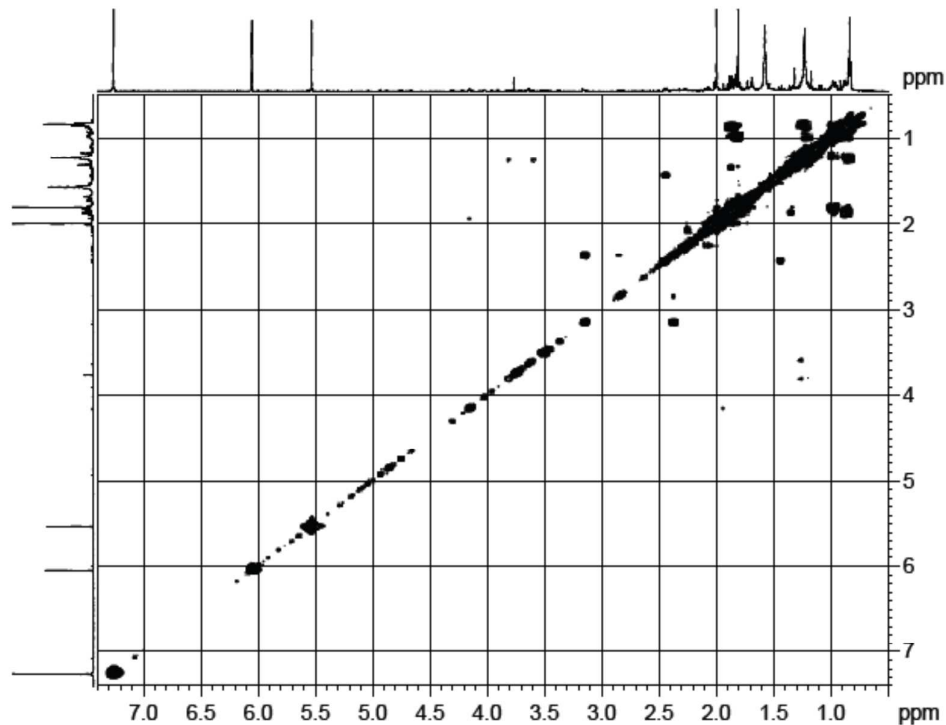

**Figure S34.** HRESIMS spectrum of compound **5**.

Scan: #150869  $\mu$ S: 1 IT: 12.4 NL: 1.38E7  
Type: FTMS + p ESI Full ms [200.00-410.00]

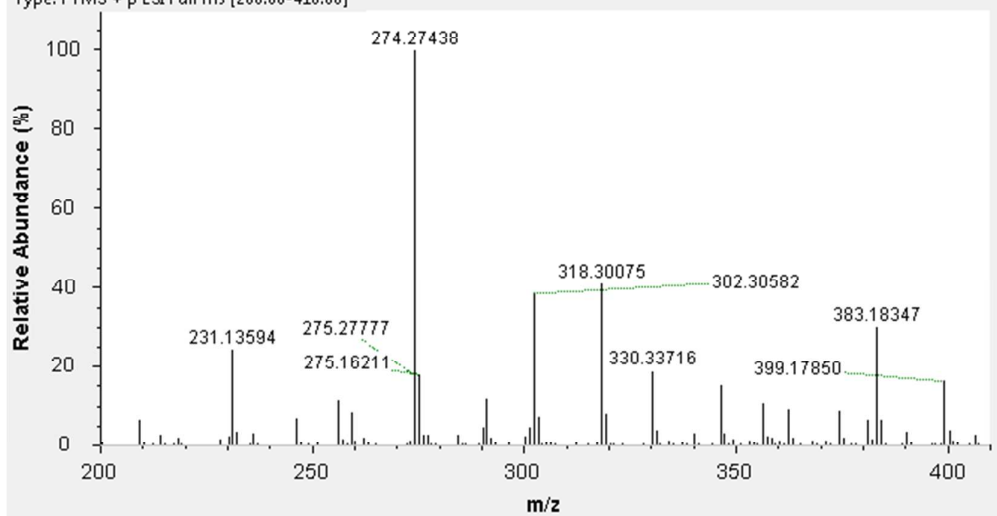

**Figure S35.**  $^1\text{H}$  NMR spectrum (600 MHz) of compound **6** in  $\text{CDCl}_3$ .

WP-32,  $^1\text{H}$ ,  $\text{CDCl}_3$ , 600MHz

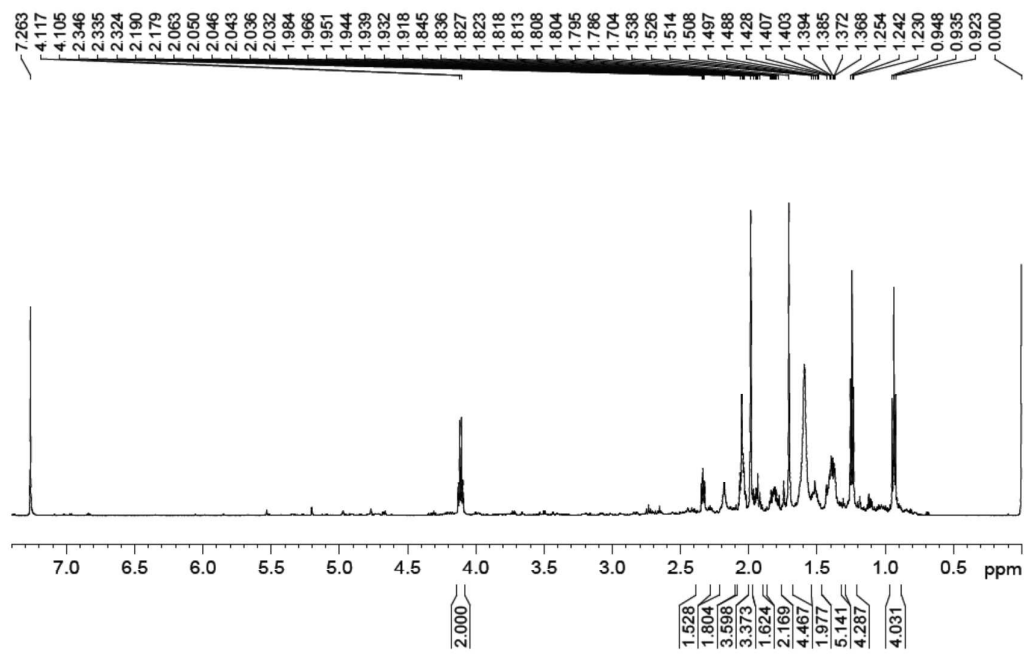

**Figure S36.**  $^{13}\text{C}$  NMR spectrum (150 MHz) of compound **6** in  $\text{CDCl}_3$ .

WP-32,  $^{13}\text{C}$ ,  $\text{CDCl}_3$ , 150MHz

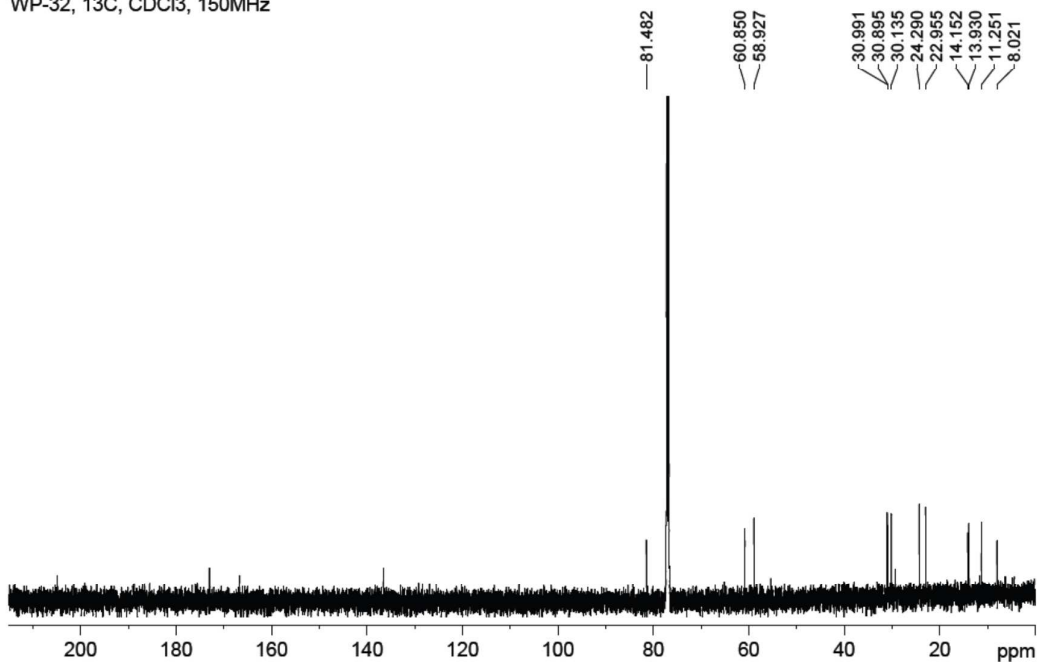

**Figure S37.** HMQC spectrum of compound **6** in CDCl<sub>3</sub>.

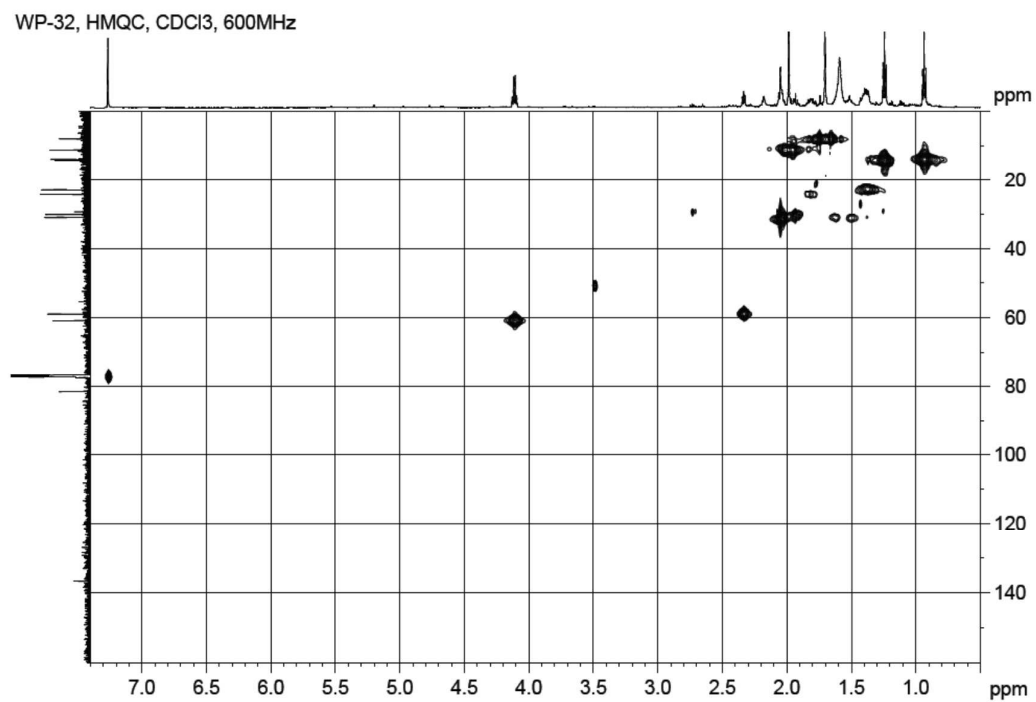

**Figure S38.** HMBC spectrum of compound **6** in CDCl<sub>3</sub>.

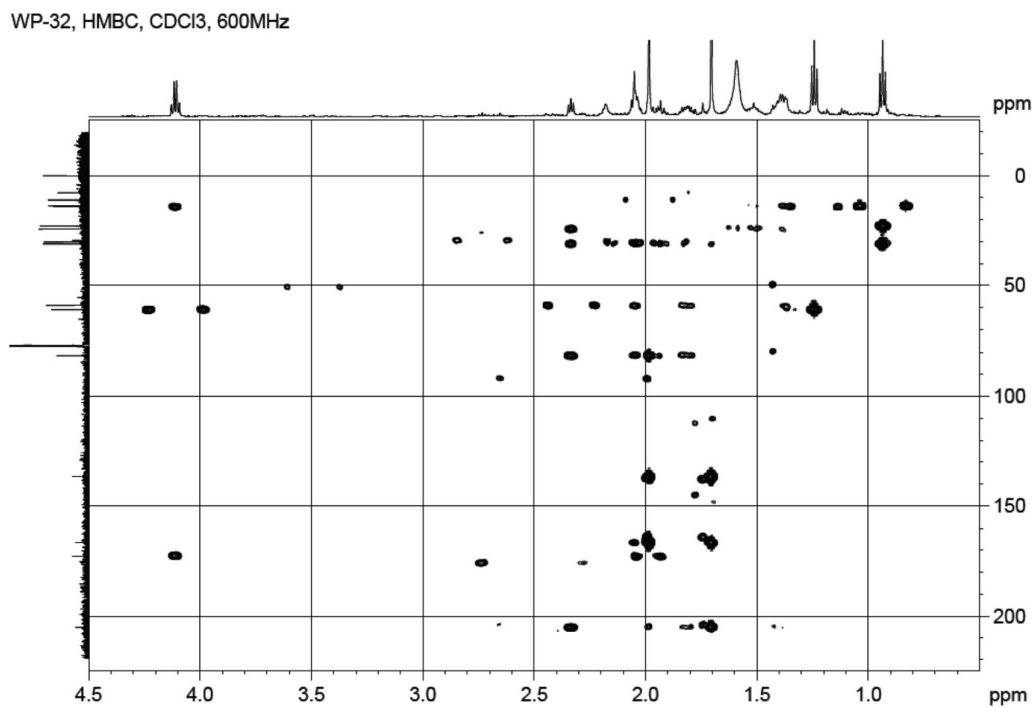

**Figure S39.** COSY spectrum of compound **6** in  $\text{CDCl}_3$ .

WP-32, COSY,  $\text{CDCl}_3$ , 600MHz

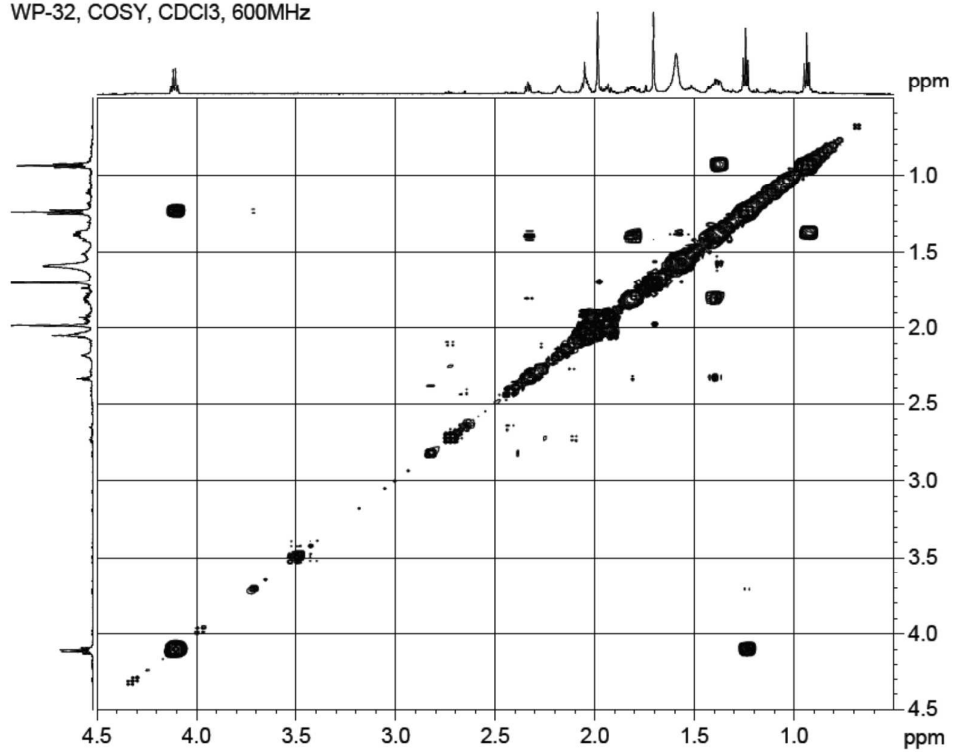

**Figure S40.** NOESY spectrum of compound **6** in  $\text{CDCl}_3$ .

WP-32, NOESY,  $\text{CDCl}_3$ , 600MHz

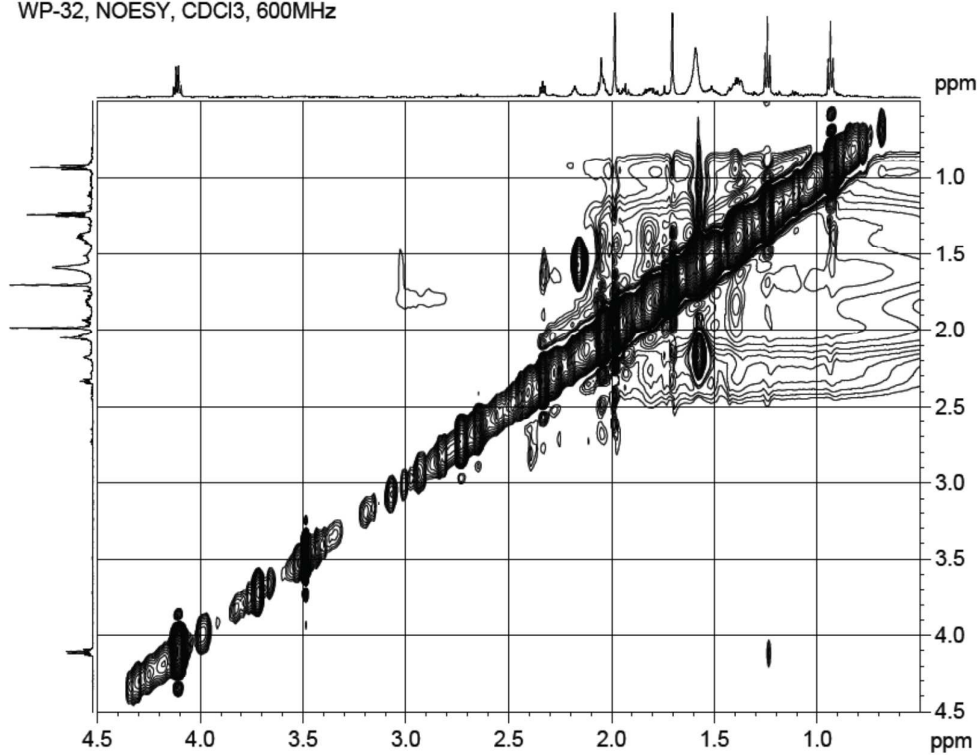

**Figure S41.** HRESIMS spectrum of compound **6**.

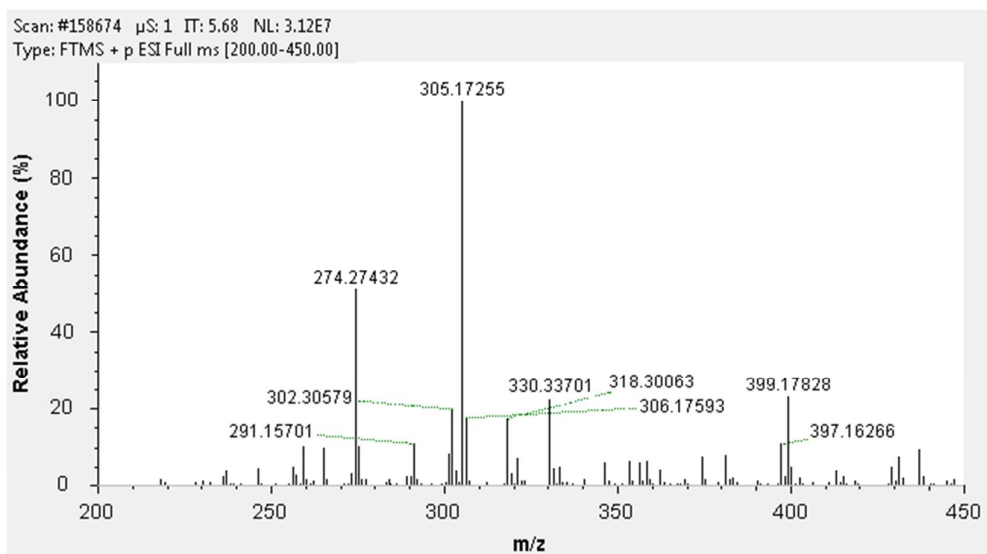

**Figure S42.**  $^1\text{H}$  NMR spectrum (600 MHz) of compound **16** in  $\text{CDCl}_3$ .

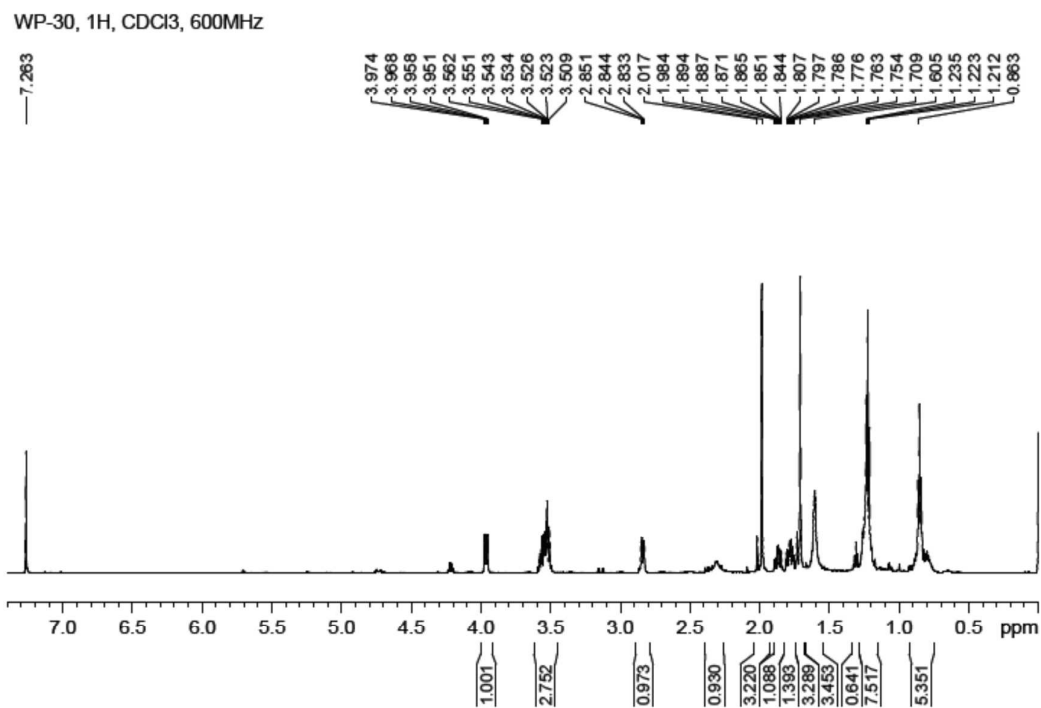



**Figure S43.**  $^{13}\text{C}$  NMR spectrum (150 MHz) of compound **16** in  $\text{CDCl}_3$ .

WP-30,  $^{13}\text{C}$ ,  $\text{CDCl}_3$ , 150MHz

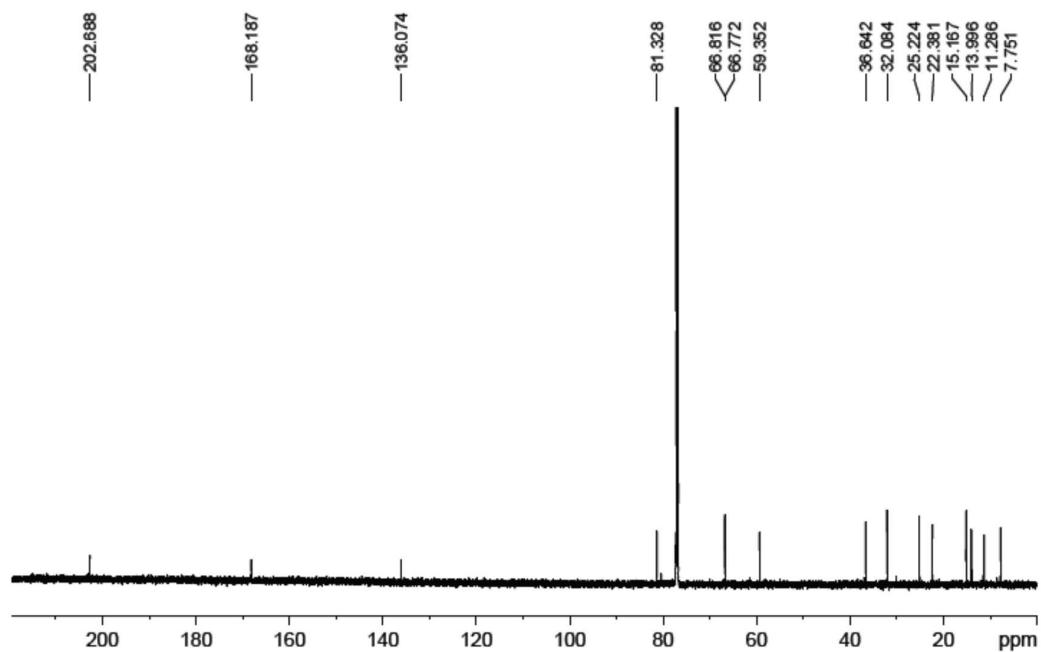

**Figure S44.** HMQC spectrum of compound **16** in  $\text{CDCl}_3$ .

WP-30, HMQC,  $\text{CDCl}_3$ , 600MHz

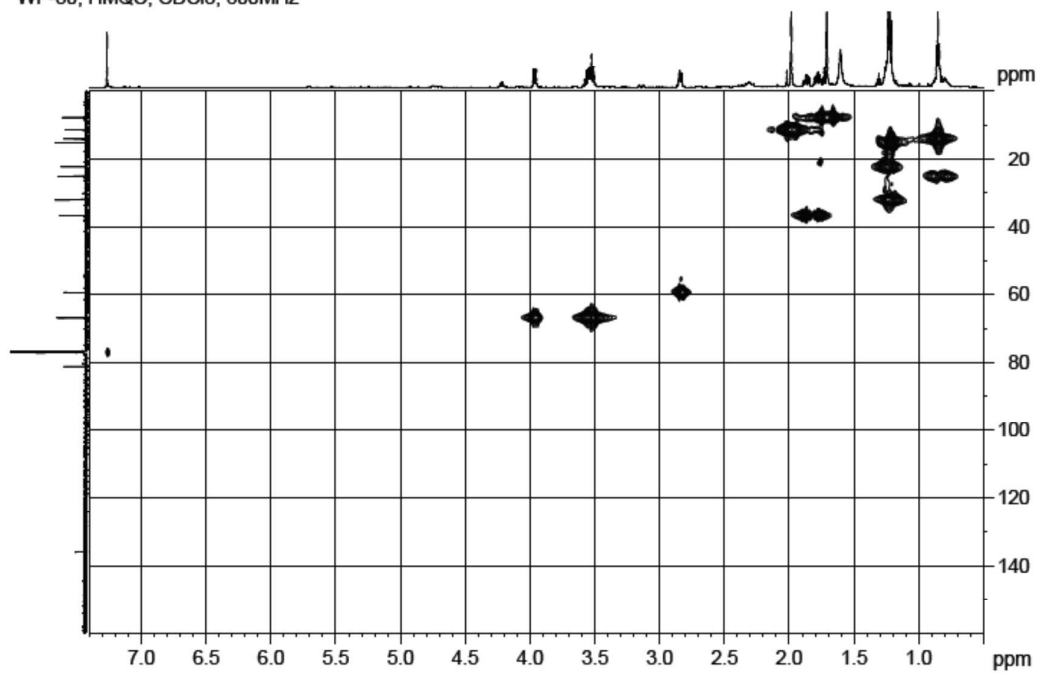

**Figure S45.** HMBC spectrum of compound **16** in CDCl<sub>3</sub>.

WP-30, HMBC, CDCl<sub>3</sub>, 600MHz

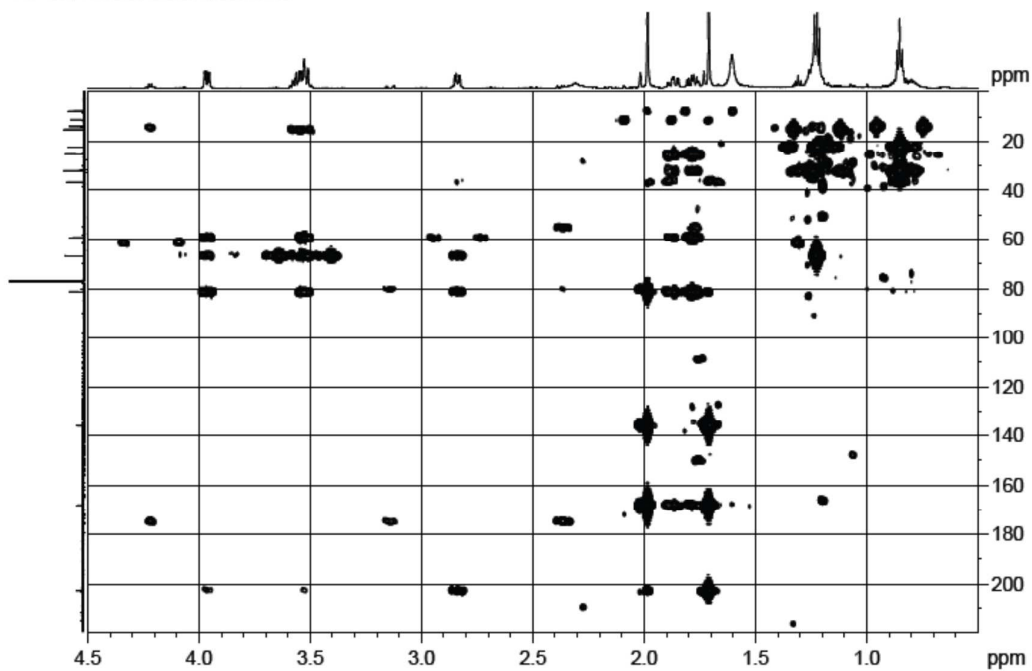

**Figure S46.** COSY spectrum of compound **16** in CDCl<sub>3</sub>.

WP-30, COSY, CDCl<sub>3</sub>, 600MHz

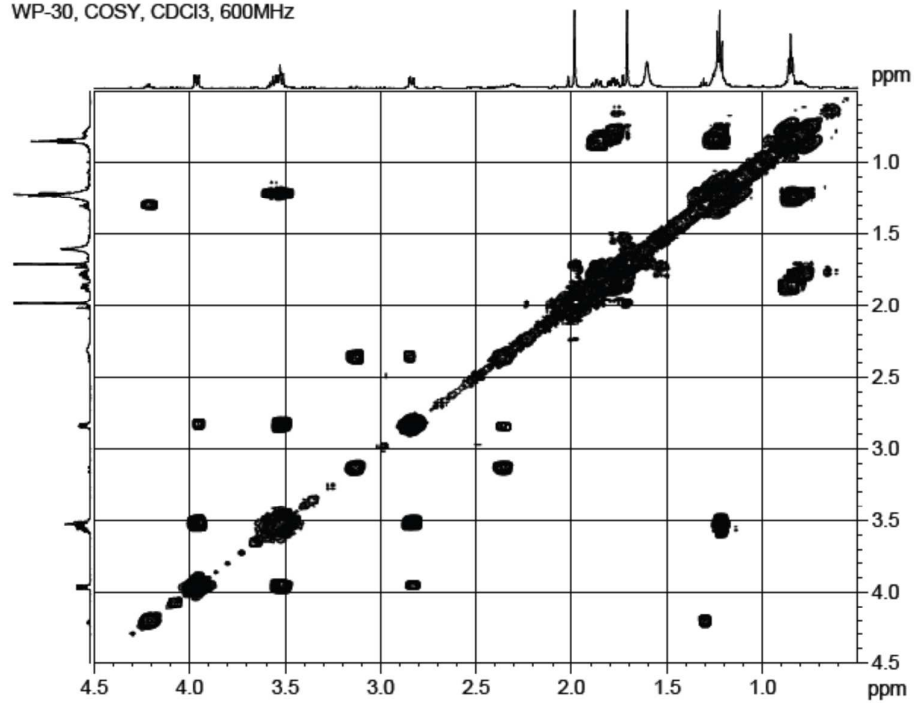

**Figure S47.** NOESY spectrum of compound **16** in CDCl<sub>3</sub>.

WP-30, NOESY, CDCl<sub>3</sub>, 600MHz

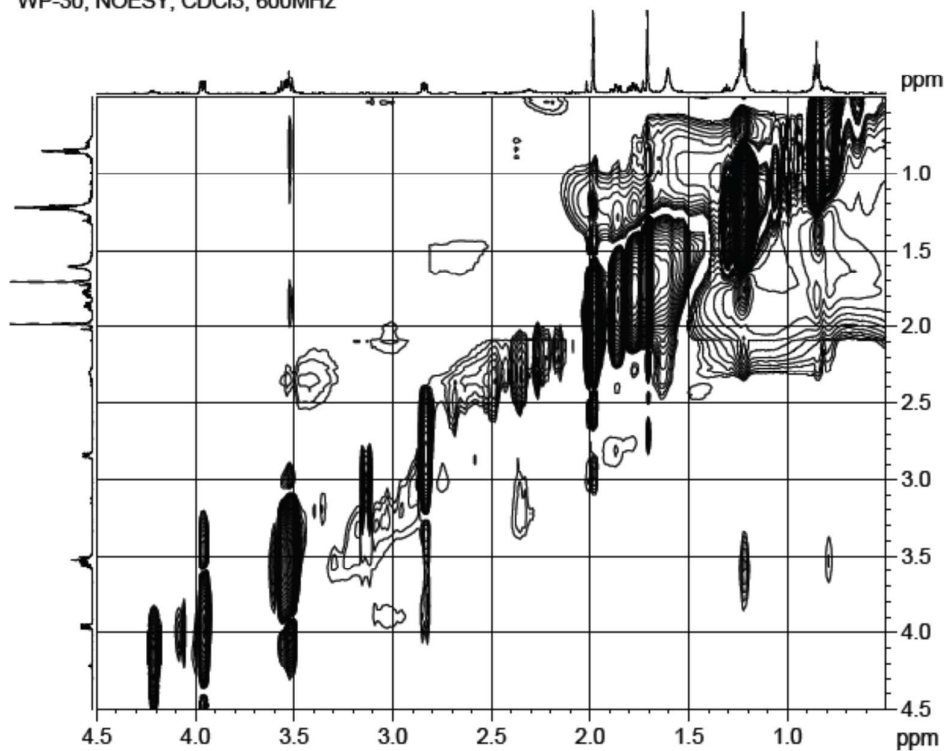

**Figure S48.** HRESIMS spectrum of compound **16**.

Scan: #157602  $\mu$ S: 1 IT: 4.68 NL: 6.19E7  
Type: FTMS + p ESI Full ms [220.00-480.00]

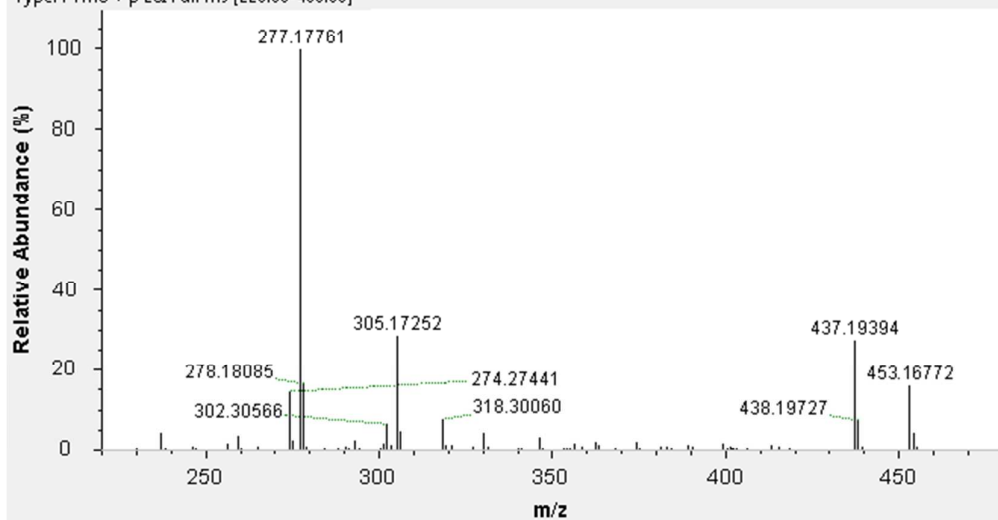

**Figure S49.**  $^1\text{H}$  NMR spectrum (600 MHz) of compound **17** in  $\text{CDCl}_3$ .

WP-22, 1H,  $\text{CDCl}_3$ , 600MHz

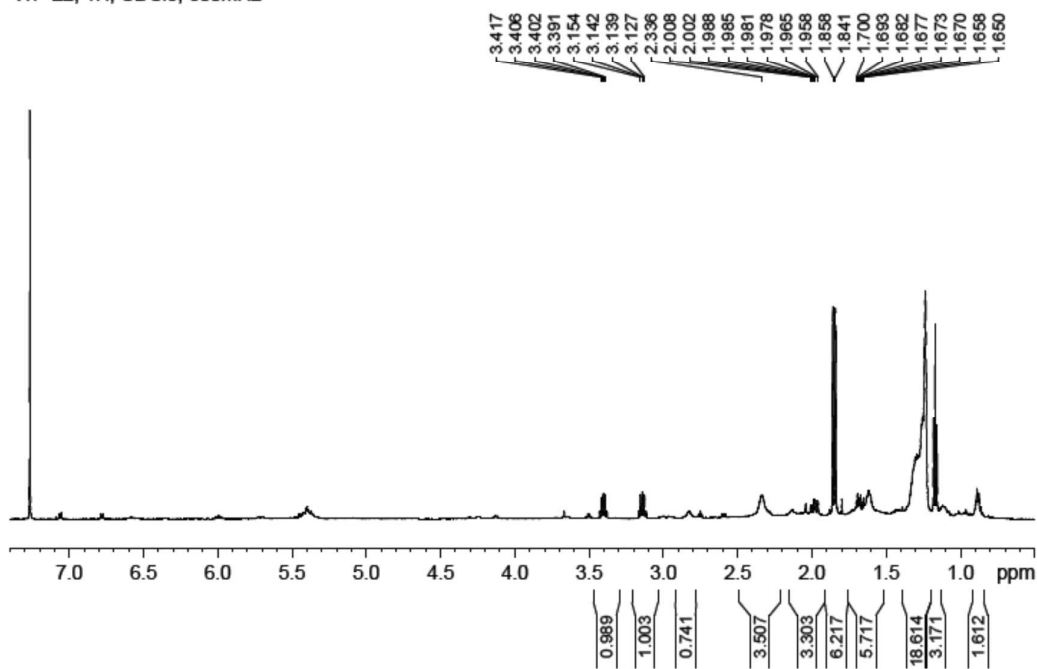

**Figure S50.**  $^{13}\text{C}$  NMR spectrum (150 MHz) of compound **17** in  $\text{CDCl}_3$ .

WP-22,  $^{13}\text{C}$ ,  $\text{CDCl}_3$ , 150MHz

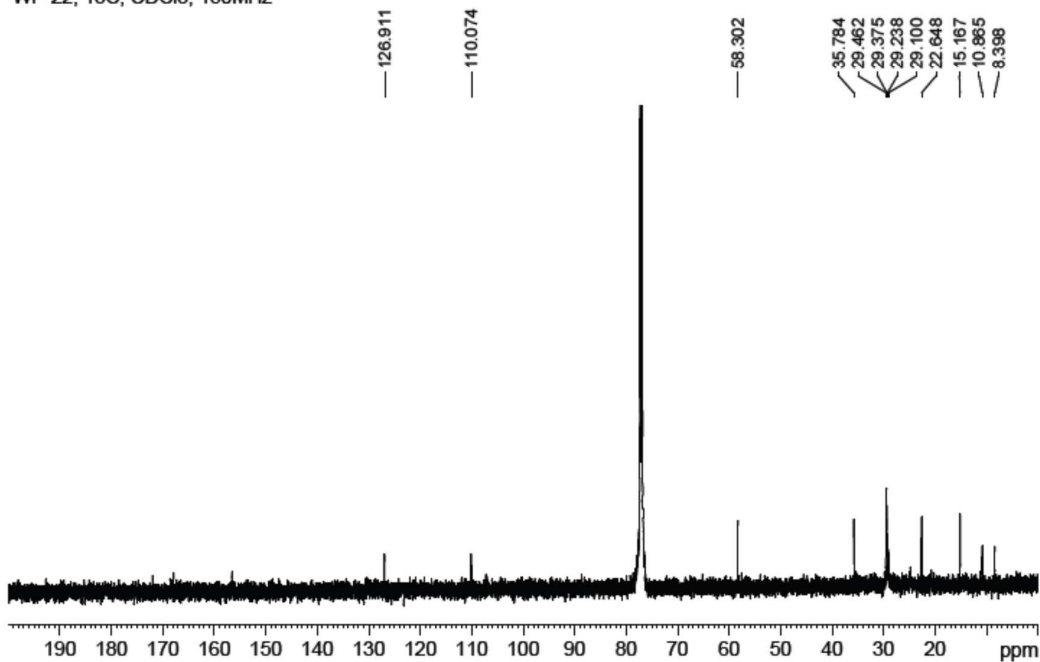

**Figure S51.** HMQC spectrum of compound **17** in CDCl<sub>3</sub>.

WP-22, HMQC, CDCl<sub>3</sub>, 600MHz

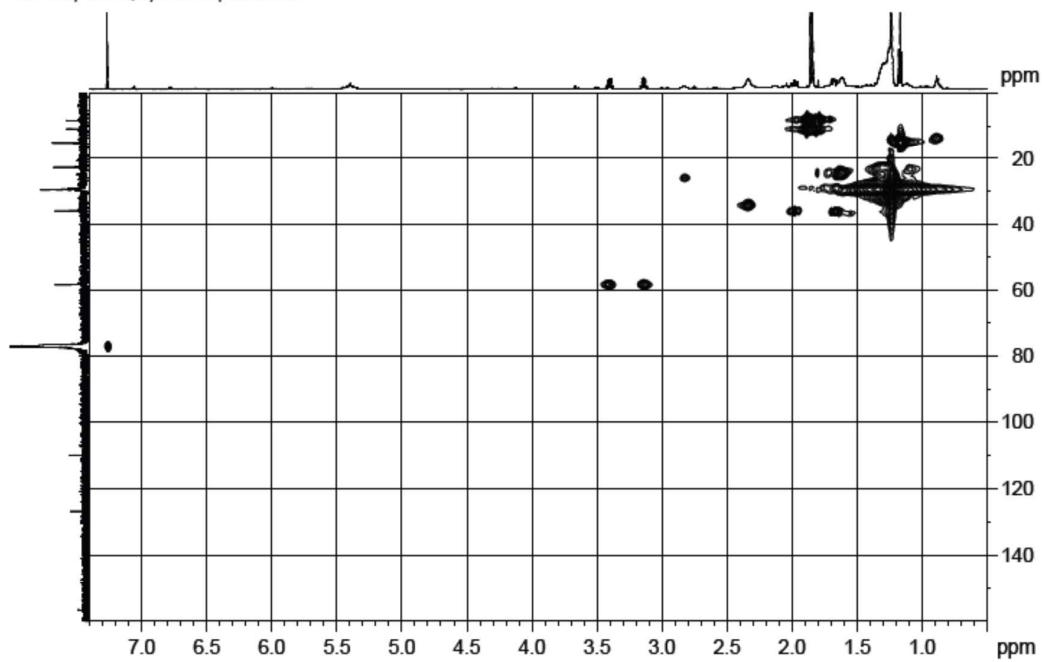

**Figure S52.** HMBC spectrum of compound **17** in CDCl<sub>3</sub>.

WP-22, HMBC, CDCl<sub>3</sub>, 600MHz

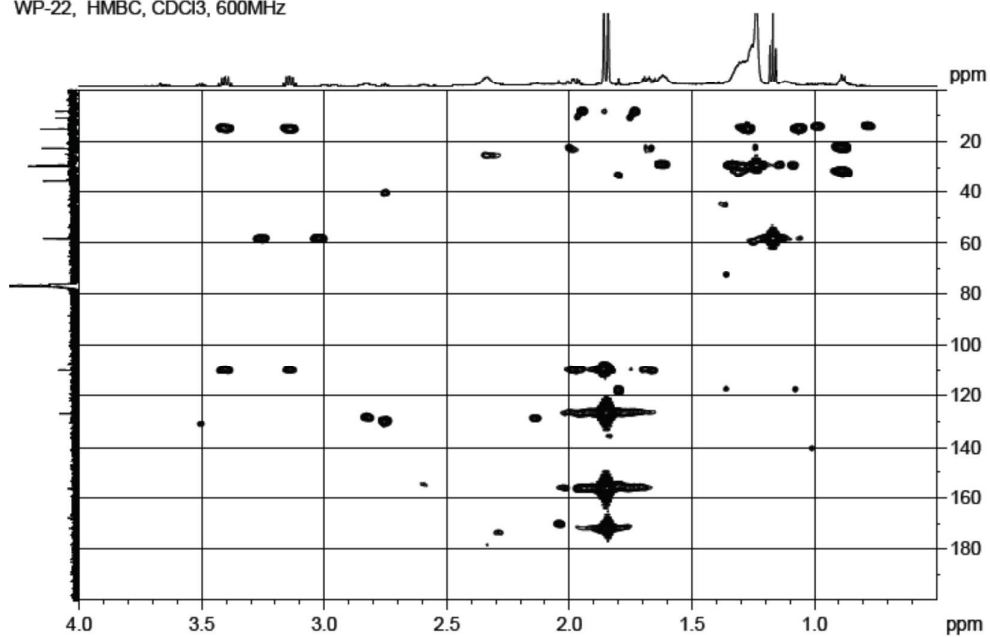

**Figure S53.** COSY spectrum of compound **17** in CDCl<sub>3</sub>.

WP-22, COSY, CDCl<sub>3</sub>, 600MHz

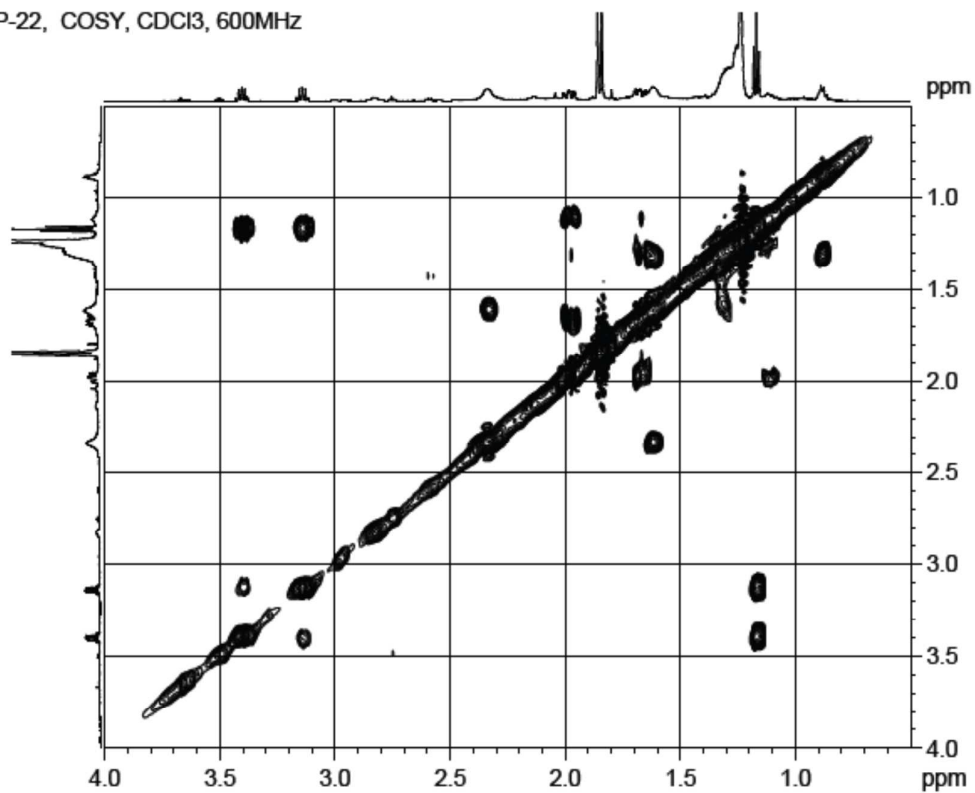

**Figure S54.** HRESIMS spectrum of compound **17**.

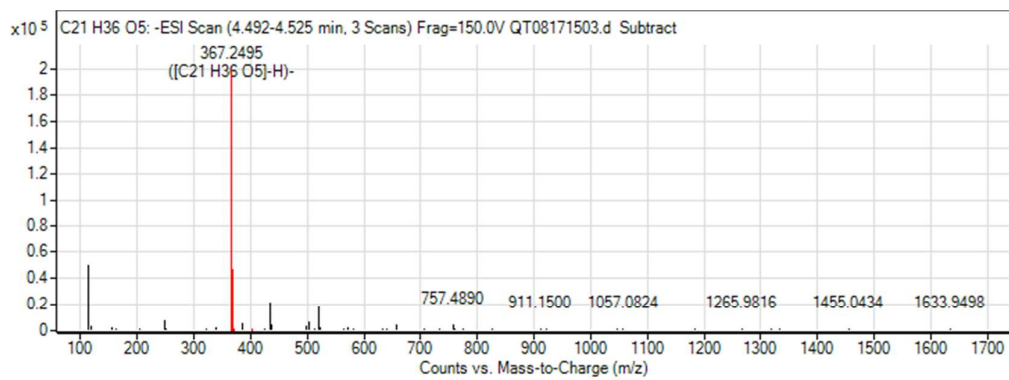

Supplement: NIHMS999740-supplement-supplemental.pdf [file NIHMS999740-supplement-supplemental.pdf]
